# Supplementary material for: The global implications of uncertainty in China's climate policy delivery
Source: Research Square preprint supplement (doi:10.21203/rs.3.rs-6699194/v1), 2025-07-14
Supplement: Supplementary file 1 [file 079a9c6b88df2480b7693803.xlsx]

## Sheet: China's climate policy review
		China's updated China’s Nationally Determined Contributions (NDC)
		Status	Policy	Issued from	Issue date	Target year	Numerical targets invloved	TIAM-UCL quantifiable or not(Y=YES, N=No)	Source
		Updated NDC	China’s Achievements, New Goals and New Measures for Nationally Determined Contributions	China	2021.10.	Before 2030	aims to have CO2 emissions peak	Y	https://unfccc.int/sites/default/files/NDC/2022-06/China%E2%80%99s%20Achievements%2C%20New%20Goals%20and%20New%20Measures%20for%20Nationally%20Determined%20Contributions.pdf
						By 2030	lower CO2 emissions per unit of GDP by over 65% from the 2005 level	Y
						By 2030	to increase the share of non-fossil fuels in primary energy consumption to around 25%	Y
						By 2030	to increase the forest stock volume by 6 billion cubic meters from the 2005 level	N
						By 2030	to bring its total installed capacity of wind and solar power to over 1.2 billion kilowatts	Y
						By 2060	achieve carbon neutrality	Y
		China’s Mid-Century Long-Term Low Greenhouse Gas Emission Development Strategy( LTS)
		LTS	China’s Mid-Century Long-Term Low Greenhouse Gas Emission Development Strategy	China	2021.1	By 2060	achieve carbon neutriality	Y	https://unfccc.int/sites/default/files/resource/China’s%20Mid-Century%20Long-Term%20Low%20Greenhouse%20Gas%20Emission%20Development%20Strategy.pdf
						By 2060	improve the proportion of non-fossil fuels in energy consumption up to over 80%.	Y
		China's climate policy "1+N" System
		“1”: Top-level working guidance
		1	Working Guidance for Carbon Dioxide Peaking and Carbon Neutrality in Full and Faithful Implementation of the New Development Philosophy	CPC Central Committee State Council	2021.10.24	By 2025	energy consumption per unit of GDP will be lowered by 13.5% from the 2020 level	Y	http://www.news.cn/english/2021-10/24/c_1310265726.htm
						By 2025	carbon dioxide (CO2) emissions per unit of GDP will be lowered by 18% from the 2020 level	Y
						By 2025	the share of non-fossil energy consumption will have reached around 20%;	Y
						By 2025	the forest coverage rate will have reached 24.1%, and the forest stock volume will have risen to 18 billion cubic meters	N
						By 2030	CO2 emissions per unit of GDP will have dropped by more than 65% compared with the 2005 level;	Y
						By 2030	the share of non-fossil energy consumption will have reached around 25%	Y
						By 2030	the total installed capacity of wind power and solar power reaching over 1200 gigawatts	Y
						By 2030	the forest coverage rate will have reached about 25%, and the forest stock volume will have reached 19 billion cubic meters.	N
						By 2060	the share of non-fossil energy consumption will be over 80%.	Y
						By 2060	carbon next zero	Y
		1	The Action Plan for Carbon Peaking Before 2030	CPC Central Committee State Council	2021.10.26	By 2025	the share of non-fossil fuels in total energy consumption will reach around 20%	Y	http://www.news.cn/english/2021-10/27/c_1310270985.htm
						By 2025	energy consumption per unit of GDP will drop by 13.5%	Y
						By 2025	carbon dioxide emissions per unit of GDP will drop by 18%	Y
						By 2025	installed capacity of new types of energy storage will reach 30 gigawatts or more.	N
						By 2025	domestic capacity for primary refining of crude oil will be kept below 1 billion metric tons, and the utilization rate of production capacity for main products will rise to 80% or more.	Y
						By 2025	renewable resources will account for 8% of the alternative to conventional energy used in buildings	Y
						By 2025	a basic sorting system for urban household waste will be established, with the reclamation rate up to about 60%.	N
						By 2025	strive to reach 50% photovoltaic coverage on the roofs of newly constructed public buildings and factories.	N
						By 2030	the share of non-fossil energy consumption will reach around 25%	Y
						By 2030	carbon dioxide emissions per unit of GDP will have dropped by more than 65% compared with the 2005 level,	Y
						By 2030	total installed generation capacity of wind and solar power will reach above 1200 gigawatts.	Y
						By 2030	Approximately 40 gigawatts of additional hydro power capacity will be installed during both the 14th and 15th Five-Year Plan periods, respectively,	Y
						By 2030	the share of incremental vehicles fueled by new and clean energy will reach around 40%	Y
						By 2030	carbon emission intensity of commercial vehicles measured on the basis of converted turnover will be cut by about 9.5% compared with 2020.	N
						By 2030	comprehensive energy consumption of the national railways per unit of converted turnover will be cut by 10% compared with 2020.	N
						By 2030	strive to reach a peak in petroleum consumption for land transportation before 2030.	Y
						By 2030	all ground vehicles and equipment at civil airports will strive to be powered by electricity.	N
						By 2030	By 2025, the amount of bulk solid waste recycled annually will reach around 4 billion metric tons, rising to about 4.5 billion by 2030.	N
						By 2030	By 2025, the total amount of nine major reusable resources including steel scrap, cooper, aluminum, lead, zinc, waste paper, plastic, rubber, and glass recycled will top 450 million metric tons, reaching 510 million by 2030.	N
						By 2030	the sorting system for urban household waste will cover all cities, and the reclamation rate will rise to 65%.	N
						By 2030	expand forest coverage around 25% of China’s total land area and increase forest stock volume to 19 billion cubic meters by 2030.	N
						By 2030	carbon peak before 2030	Y
		N： Policies related to ten major peaking carbon dioxide emissions actions and collarative policies with 14th Five-year plans (2020-2025)
		The action for green and low-carbon energy transition	Special refinancing loan to support the clean and efficient use of coal to promote green and low-carbon development	State council	2021.11.17	Since 2021	establish RMB 200 billion special refinancing loan to support the clean and efficient use of coal to promote green and low-carbon development. Support areas: safe, efficient, green and intelligent mining of coal, clean and efficient processing of coal, clean and efficient utilization of coal power, clean combustion and clean heating for industry, clean heating for civil use, comprehensive utiliza…	N	https://www.iea.org/policies/14460-special-refinancing-loan-to-support-the-clean-and-efficient-use-of-coal-to-promote-green-and-low-carbon-development
			2021 Biomass Power Generation Project Construction Work Program	National Development and Reform Commission Ministry of Finance National Energy Administration	2021.8.19	In 2021	the central government will allocate a 2.5 billion CNY subsidy to biomass power generation in 2021	N	https://www.ndrc.gov.cn/xxgk/zcfb/tz/202108/t20210819_1294018.html
			Opinions on Improving Institutional Mechanisms and Policy Measures for Green and Low-Carbon Energy Transition	National Development and Reform Commission National Energy Administration	2022.1.30	no numerical targets			https://www.ndrc.gov.cn/xxgk/zcfb/tz/202202/t20220210_1314511.html?code=&state=123
			14th Five-Year Plan on Modern Energy System Planning	National Development and Reform Commission National Energy Administration	2022.3.22	By 2025	annual domestic energy production capacity will reach over 4.6 billion tons of standard coal.	N	https://www.ndrc.gov.cn/xxgk/zcfb/ghwb/202203/P020220322582066837126.pdf
						By 2025	annual crude oil production will stabilize at around 200 million tons.	Y
						By 2025	annual natural gas production will exceed 230 billion cubic meters.	Y
						By 2025	total installed power generation capacity will reach approximately 3 billion kilowatts.	Y
						By 2025	the carbon dioxide emissions per unit of GDP will decrease by 18%	Y
						By 2025	the share of non-fossil energy in total energy consumption will increase to about 20%.	Y
						By 2025	the proportion of non-fossil energy in power generation will reach about 39%.	Y
						By 2025	electricity accounting for about 30% of end-use energy consumption.	Y
						By 2025	the energy consumption per unit of GDP will decrease by 13.5% over five years.	Y
						By 2025	the national centralized gas storage capacity will reach 55-60 billion cubic meters, accounting for approximately 13% of the total natural gas consumption.	N
						By 2025	the installed capacity of conventional hydropower will reach approximately 380 million kilowatts.	Y
						By 2025	the operational installed capacity of nuclear power will reach approximately 70 million kilowatts.	Y
						By 2025	new energy vehicles will account for about 20% of new vehicle sales, especially in urban public transportation and other fields.	Y
						By 2025	the national oil and gas pipeline network will expand to approximately 210,000 kilometers.	N
						By 2030	The share of non-fossil energy consumption will significantly increase from 25% in 2030.	Y
			Medium- and long-term plan for the development of the hydrogen energy industry (2021-2035)	National Development and Reform Commission National Energy Administration	2022.3.23	By 2025	Reach a fuel cell vehicle fleet of approximately 50,000 units, with the construction of several hydrogen refueling stations.	N	http://zfxxgk.nea.gov.cn/1310525630_16479984022991n.pdf
						By 2025	Produce 100,000 to 200,000 tons of hydrogen from renewable energy annually	Y
			Benchmarking Levels in Key Fields of Clean and Efficient Coal Utilization (2022 Edition)	National Development and Reform Commission other Ministries	2022.5.10	Since 2022	Specific numerical limits have been set for the energy consumption and emission standards of coal-fired power generation, coal-fired boilers for heating, coal-based ammonia synthesis, coal-based coke production, coal-based methanol production, and other coal utilization units.	N	https://www.ndrc.gov.cn/xxgk/zcfb/tz/202205/t20220510_1324482.html?code=&state=123
			14th Five-Year Plan of Renewable Energy	Nine ministries s including the National Development and Reform Commission jointly	2022.6.1	By 2025	Total renewable energy consumption will reach about 1 billion tons of standard coal(~29,300PJ)	Y	https://www.ndrc.gov.cn/xwdt/tzgg/202206/t20220601_1326720_ext.html
						By 2025	Total renewable energy consumption will reach about 18% of primary energy consumption.	Y
						By 2025	renewable energy will account for more than 50% of the increase in primary energy consumption.	Y
						By 2025	power generation from renewable energy will reach approximately 3.3 trillion kilowatt-hours.	Y
						By 2025	the increase in renewable energy power generation will account for more than 50% of the increase in the total social electricity consumption.	Y
						By 2025	the non-electric utilization of renewable energy (including geothermal heating, biomass heating, biomass fuels, and solar thermal utilization) will reach over 60 million tons of standard coal.	Y
						By 2025	33% of electricity generated from renewables	Y
						By 2025	18% of electricity from non-hydropower renewables	y
		The action for energy saving, carbon emission mitigation and efficiency improvement	The "14th Five-Year Plan" Comprehensive Work Plan for Energy Conservation and Emission Reduction	State Council	2021.12.28	By 2025	National energy consumption per unit of GDP will decrease by 13.5% compared to 2020.	Y	http://www.gov.cn/zhengce/content/2022-01/24/content_5670202.htm
						By 2025	The total emissions of chemical oxygen demand, ammonia nitrogen, nitrogen oxides, and volatile organic compounds will decrease by 8%, 8%, more than 10%, and more than 10% respectively compared to 2020.	N
						By 2025	530 million tons of steel production capacity will undergo ultra-low emission transformation	N
						By 2025	energy consumption per unit of added value in industries will decrease by 13.5% compared to 2020	Y
						By 2025	water consumption per unit of industrial added value will decrease by 16%.	N
						By 2025	sales of new energy vehicles will account for about 20% of total new car sales.	Y
						By 2025	rural domestic sewage treatment coverage will reach 40%.	N
						By 2025	the comprehensive utilization rate of straw will remain above 86%, and the comprehensive utilization rate of livestock and poultry manure will reach 80%.	N
						By 2025	non-fossil energy will account for about 20% of total energy consumption.	Y
						By 2025	Coal consumption in key regions will decrease by 10% in the Beijing-Tianjin-Hebei region and by 5% in the Yangtze River Delta.	N
			Implementation Plan for Synergizing the Reduction of Pollution and Carbon Emission	Seven departments including the MEE and the NDRC	2022.6.13	By 2025	the proportion of EAF in iron and steel will be increased to 15%	Y	https://www.mee.gov.cn/xxgk2018/xxgk/xxgk03/202206/t20220617_985879.html
						By 2025	the production of recycled aluminum will reach 1,150 tons	N
						By 2025	the utilization rates of fertilizers and pesticides for the three major grain crops will each be increased to 43%	N
						By 2025	the comprehensive utilization rate of newly generated major solid waste will reach 60%, and the existing major solid waste will be reduced in an orderly manner.	N
						By 2030	the proportion of EAF in iron and steel will be increased to over 20%	Y
						By 2030	the proportion of renewable energy used in electrolytic aluminum production will be raised to over 30%.	N
						By 2030	the sales volume of new energy vehicles in key areas for air pollution control will reach approximately 50% of the total new car sales.	Y
			2024-2025 Energy Conservation and Carbon Reduction Action Plan	State council	2024.5.24	By 2025	Proportion of Non-Fossil Energy Consumption: Reach around 20%.	Y	https://www.gov.cn/zhengce/content/202405/content_6954322.htm
						By 2025	Key sectors and industries will achieve energy savings of about 50 million tons of standard coal and reduce carbon dioxide emissions by approximately 130 million tons.	N
						By 2025	Coal-fired boilers with a capacity of 35 steam tons per hour or less, as well as various other coal-fired facilities, will be essentially phased out, in key air pollution control regions	N
						By 2025	the proportion of electricity generated from non-fossil energy sources nationwide will reach approximately 39%.	Y
						By 2025	the proportion of electric furnace steel production in the total crude steel output is expected to increase to 15%, and the amount of recycled steel is targeted to reach 300 million tons.	Y
						By 2025	The national crude oil primary processing capacity will be limited to within 1 billion tons.	Y
						By 2025	recycled metals will make up over 24% of the total supply.	N
						By 2025	The direct alloying ratio of aluminum water will increase to over 90%.	N
						By 2025	30% of electrolytic aluminum capacity will meet benchmark energy efficiency levels.	N
						By 2025	Renewable energy usage in the aluminum sector will reach over 25%.	N
						By 2025	50% of copper, lead, and zinc smelting capacity will meet benchmark energy efficiency levels.	N
						By 2025	control cement clinker capacity to around 1.8 billion tons.	N
						By 2025	50% of cement clinker capacity in key air pollution control areas will achieve ultra-low emissions.	N
						By 2025	Roof photovoltaic coverage for new public buildings and factories will aim for 50%.	N
						By 2025	Renewable energy use in urban buildings will reach 8%.	Y
						By 2025	Renovation area of existing buildings will increase by over 20 million square meters compared to 2023.	N
						By 2025	Energy savings in residential and public buildings will increase by 30% and 20%, respectively.	N
						By 2025	Carbon intensity of transportation will be reduced by 5% compared to 2020.	Y
		The action for peaking carbon dioxide emissions in industry sector	14th Five-Year Plan on Industrial Green Development	Ministry of Industry and Information Technology	2021.11.15	By 2025	reduce CO2 emissions per unit of industrial added value by 18%.	Y	http://www.gov.cn/zhengce/zhengceku/2021-12/03/content_5655701.htm
						By 2025	reduce emission intensity of major pollutants in key industries by 10%.	N
						By 2025	reduce energy consumption per unit of added value in above-scale industries by 13.5%;	N
						By 2025	increase comprehensive utilization rate of bulk industrial solid waste to reach 57%.	N
						By 2025	increase major recycled resources recovery volume to reach 480 million tons.	N
						By 2025	reduce water consumption per unit of industrial added value by 16%.	N
			GB 39728—2020: Emission standard of air pollutants for onshore oil and gas exploitation and production industry	Ministry of Ecology and Environment of the Development	2021.1.1	Since 2021	first pollution emission standard for the oil and gas industry with numerical standard but without any numerical targets	N	https://www.mee.gov.cn/ywgz/fgbz/bz/bzwb/dqhjbh/dqgdwrywrwpfbz/202012/t20201225_814811.shtml
			Guideline on promoting the high-quality development of the iron and steel industry	Ministry of Industry and Information Technology and Ministry of Ecology and Environment of the Development National Development and Reform Commission	2022.1.20	By 2025	increase R&D investment intensity to reach 1.5%.	N	http://www.gov.cn/zhengce/zhengceku/2022-02/08/content_5672513.htm
						By 2025	increase CNC (Computer Numerical Control) rate for key processes to reach approximately 80%.	N
						By 2025	increase digitalization rate of production equipment to reach 55%.	N
						By 2025	the proportion of electric arc furnace steel in total crude steel production rising to over 15%.	Y
						By 2025	Over 80% of steel production capacity to complete ultra-low emission transformations	N
						By 2025	decrease comprehensive energy consumption per ton of steel by over 2%.	Y
						By 2025	reduce water resource consumption intensity by over 10%.	N
			Guidelines for the implementation of energy-saving and carbon reduction transformation and upgrading in key areas of high energy-consuming industries (2022 version)	National Development and Reform Commission and other four ministries	2022.2.3	By 2025	Standards and compliance ratios for the energy efficiency of 17 industries have been regulated: refining, cement, glass, steel, non-ferrous metals, ethylene, paraxylene, modern coal chemical industry, synthetic ammonia, and calcium carbide industries	N	https://www.ndrc.gov.cn/xxgk/zcfb/tz/202202/t20220211_1315446_ext.html
			Guiding Opinions on Promoting the High-quality Development of the Petrochemical and Chemical Industry During the 14th Five-year Plan	Six ministries including the Ministry of Industry and Information Technology Plan	2022.4.8	By 2025	research and development (R&D) investment of enterprises above a designated size to account for more than 1.5%	N	https://www.gov.cn/zhengce/zhengceku/2022-04/08/content_5683972.htm
						By 2025	Increase the concentration of major chemical products production, with capacity utilization rates reaching over 80%.	N
						By 2025	enhance ethylene equivalent assurance levels and ensure that the guarantee level for new chemical materials reaches over 75%.	N
						By 2025	achieve a 95% automation control rate for major production facilities in key sectors such as petrochemicals and coal chemical industries.	N
			Guiding opinions on the high-quality development of the chemical fiber industry during the 14th Five-year Plan	Ministry of Industry and Information Technology National Development and Reform Commission	2022.4.21	By 2025	Industrial value added by large-scale chemical fiber enterprises to grow annually by 5%.	N	https://www.miit.gov.cn/zwgk/zcwj/wjfb/yj/art/2022/art_a01b7532a39a41e891d2540da6981d72.html
						By 2025	Increase industry R&D investment intensity to 2%.	N
						By 2025	achieve an 80% digitalization rate in enterprise management.	N
						By 2025	Increase the proportion of green fibers to over 25%.	N
			Guiding opinions on the high-quality development of the technical textile industry	Ministry of Industry and Information Technology National Development and Reform Commission	2022.4.21	By 2025	Achieve an annual growth rate of approximately 6% in industrial value added.	N	https://www.miit.gov.cn/zwgk/zcwj/wjfb/yj/art/2022/art_6ff2a1f968264ee7bc89888fd480a43b.html
						By 2025	Increase R&D expenditure as a percentage of main business revenue to 3% for key industry enterprises.	N
						By 2025	Reach a 15% application rate for recycled fibers and biomass fibers.	N
						By 2025	Achieve a 70% numerical control rate for key processes in non-woven fabric enterprises.	N
			Guiding Opinions on Promoting High-quality Development of Light Industry	Five ministries including the Ministry of Industry and Information Technology	2022.6.17	No numerical target			https://www.gov.cn/zhengce/zhengceku/2022-06/19/content_5696665.htm
			Action Plan for Industrial Water Efficiency Improvement	Six ministries including the Ministry of Industry and Information Technology	2022.6.21	By 2025	Reduce water use per ten thousand yuan of industrial added value by 16% compared to 2020.	N	http://www.gov.cn/zhengce/zhengceku/2022-06/22/content_5697083.htm
						By 2025	Steel Industry: Decrease water use per ton of steel by 10%. Paper Industry: Reduce water use per unit of major products by 10%. Petrochemical Industry: Cut water use per unit of major products by 5%. Textile, Food, and Non-Ferrous Metal Industries: Lower water use per unit of major products by 15%.	N
						By 2025	a nationwide water reuse rate of approximately 94% in large-scale industrial sectors.	N
			Action Plan for Industrial Energy Efficiency Improvement	Six ministries including the Ministry of Industry and Information Technology	2022.6.29	By 2025	the energy consumption per unit of industrial added value in large-scale industries is expected to decrease by 13.5% compared to 2020.	Y	http://www.gov.cn/zhengce/zhengceku/2022-06/29/content_5698410.htm
						By 2025	electricity is expected to account for approximately 30% of the industrial end-use energy consumption.	Y
			The Implementation Plan for Carbon Peaking in the Industrial Sector	Ministry of Industry and Information Technology Ministry of Ecology and Environment of the National Development and Reform Commission	2022.7.7	By 2025	the energy consumption per unit of industrial added value in large-scale industries is expected to decrease by 13.5% compared to 2020.	Y	http://www.gov.cn/zhengce/zhengceku/2022-08/01/content_5703910.htm
						By 2025	the proportion of EAF in iron and steel will be increased to 15%	Y
						By 2025	the proportion of direct alloying of molten aluminum will increase to over 90%	N
						By 2025	the production of recycled copper and recycled aluminum will reach 4 million tons and 11.5 million tons, respectively, with the share of recycled metals in total supply reaching over 24%.	N
						By 2030	the proportion of EAF in iron and steel will be increased to over 20%	Y
						By 2030	the proportion of renewable energy used in electrolytic aluminum production will rise to over 30%.	N
			Action Plan for Strict Energy Efficiency Constraints to Promote Energy Conservation and Carbon Reduction in Key Industries of Metallurgy and Building Materials (2021-2025)	National Development and Reform Commission	2021.10.21	By 2025	the proportion of production capacity in the steel, electrolytic aluminum, cement, and flat glass industries that meets benchmark energy efficiency levels will exceed 30%.	N	https://www.ndrc.gov.cn/xxgk/zcfb/tz/202110/t20211021_1300583_ext.html
							the proportion of production capacity in the refining, ethylene, synthetic ammonia, and calcium carbide industries that meets benchmark levels will exceed 30%.	N
			Action Plan for Strict Energy Efficiency Constraints to Promote Energy Conservation and Carbon Reduction in the Petrochemical Industry (2021-2025)	National Development and Reform Commission	2021.10.21	By 2025	the proportion of production capacity in the refining, ethylene, synthetic ammonia, and calcium carbide industries that meets benchmark levels will exceed 30%.	N	https://www.ndrc.gov.cn/xxgk/zcfb/tz/202110/t20211021_1300583_ext.html
			14th Five-Year Plan for the Development of the Raw Materials Industry	Ministry of Industry and Information Technology (MIIT) Ministry of Science and Technology (MOST) Ministry of Natural Resources	2021.12.21	By 2025	R&D investment intensity in key sectors reaching over 1.5%.	N	https://www.gov.cn/zhengce/zhengceku/2021-12/29/content_5665166.htm
						By 2025	In the steel industry, comprehensive energy consumption per ton of steel will be reduced by 2%.	Y
						By 2025	the energy consumption per unit of cement clinker will be reduced by 3.7%.	N
						By 2025	the carbon emissions in the electrolytic aluminum sector will decrease by 5%.	N
			Special Action Plan for Energy Conservation and Carbon Reduction in the Cement Industry	National Development and Reform Commission Ministry of Industry and Information Technology Ministry of Ecology and Environment State Administration for Market Regulation National Energy Administration	2024. 5.27	By 2025	cement clinker production capacity will be controlled at around 1.8 billion tons.	N	https://www.gov.cn/zhengce/zhengceku/202406/content_6956305.htm
						By 2025	The proportion of capacity meeting the energy efficiency benchmark level will reach 30%.	N
						By 2025	The comprehensive energy consumption per unit of cement clinker product will be reduced by 3.7% compared to 2020 levels.	N
			Special Action Plan for Energy Conservation and Carbon Reduction in the Oil Refining Industry	National Development and Reform Commission Ministry of Industry and Information Technology Ministry of Ecology and Environment State Administration for Market Regulation National Energy Administration	2024. 5.27	By 2025	the national crude oil primary processing capacity will be controlled within 1 billion tons.	Y	https://www.gov.cn/zhengce/zhengceku/202406/content_6956304.htm
							the proportion of capacity meeting the energy efficiency benchmark level exceeding 30%.	N
							Between 2024 and 2025,an energy saving of approximately 2 million tons of standard coal and a reduction of about 5 million tons of carbon dioxide emissions will be achieved.	N
			Special Action Plan for Energy Conservation and Carbon Reduction in the Ammonia Synthesis Industry	National Development and Reform Commission Ministry of Industry and Information Technology Ministry of Ecology and Environment State Administration for Market Regulation National Energy Administration	2024. 5.27	By 2025	the proportion of capacity in the ammonia synthesis industry that meets the energy efficiency benchmark level will increase to 30%.	N	https://www.gov.cn/zhengce/zhengceku/202406/content_6956306.htm
			Special Action Plan for Energy Conservation and Carbon Reduction in the Steel Industry	National Development and Reform Commission Ministry of Industry and Information Technology Ministry of Ecology and Environment State Administration for Market Regulation National Energy Administration	2024. 5.27	By 2025	Between 2024 and 2025, an energy saving of approximately 5 million tons of standard coal and a reduction of about 13 million tons of carbon dioxide emissions will be achieved.	N	https://www.gov.cn/zhengce/zhengceku/202406/content_6956307.htm
		The action for peaking carbon dioxide emissions in urban-rural development area	Opinions on Promoting Green Development in Urban and Rural Construction	General Office of the Central Committee of the Communist Party of China General Office of the State Council	2021.10.21	No numerical target			http://www.gov.cn/zhengce/2021-10/21/content_5644083.htm
			14th Five-Year Plan for Promoting Agricultural and Rural Modernization	State Council	2021.11.12	By 2025	Grain comprehensive production capacity greater than 650 million tons.	N	http://www.gov.cn/zhengce/content/2022-02/11/content_5673082.htm
						By 2025	The comprehensive utilization rate of livestock and poultry manure exceeds 80%.	N
						By 2025	High-standard farmland area will increase to 107.5 million acres. Additionally , there are another 14 planning numerical targets	N
			14th Five-Year Plan" for the Development of the Construction Industry	Ministry of Housing and Urban-Rural Development	2022.1.19	By 2025	The added value of the construction industry will maintain a proportion of approximately 6% of the Gross Domestic Product (GDP).	N	http://www.gov.cn/zhengce/zhengceku/2022-01/27/content_5670687.htm
						By 2025	The proportion of prefabricated buildings in new constructions will reach over 30%.	N
			GB 55015-2021 - General Code for Building Energy Efficiency and Renewable Energy Utilization	Ministry of Housing and Urban-Rural Development	2021.12	Since 2022	the carbon emission intensity of new residential and public buildings should be reduced by an average of 40% on the basis of the energy-saving design standards implemented in 2016, and the carbon emission intensity should be reduced by more than 7kgCO2/(m2 · a) on average.	N	https://baiyin.gov.cn/szjj/fdzdgknr/zcjd/art/2022/art_edbd21564adb42b38b73ae654ef247ad.html
			14th Five-Year Plan for Housing and Urban-Rural Construction Science and Technology Development	Ministry of Housing and Urban-Rural Development	2022.3.1	No numerical target			https://www.gov.cn/zhengce/zhengceku/2022-03/12/content_5678693.htm
			14th Five-Year Plan for Building Energy Efficiency and Green Building Development	Ministry of Housing and Urban-Rural Development	2022.3.11	By 2025	The total consumption of primary and secondary energy in building operations reaches 1.15 billion tons of standard coal.	N	http://www.gov.cn/zhengce/zhengceku/2022-03/12/content_5678698.htm
						By 2025	The energy efficiency level of newly constructed residential buildings in urban areas improves by 30%.	N
						By 2025	The energy efficiency level of newly constructed public buildings in urban areas improves by 20%.	N
						By 2025	Complete energy-saving retrofits for over 350 million square meters of existing buildings.	N
						By 2025	Construct over 50 million square meters of ultra-low-energy and near-zero-energy buildings.	N
						By 2025	Ensure that prefabricated buildings make up 30% of newly constructed urban buildings in the year.	N
						By 2025	Increase newly added solar photovoltaic installed capacity to 50 million kilowatts.	Y
						By 2025	Increase geothermal energy building application area to over 100 million square meters.	N
						By 2025	Renewable energy substitution rate in urban buildings: Reaches 8%.	Y
						By 2025	Proportion of electricity consumption in building energy consumption: Exceeds 55%.	Y
			Implementation Plan for Emission Reduction and Carbon Sequestration in Agriculture and Rural Areas	Ministry of Agriculture and Rural Affairs and the National Development and Reform Commission	2022.6.30	No numerical target			http://www.moa.gov.cn/govpublic/KJJYS/202206/t20220630_6403715.htm
			Implementation plan for carbon peaking in urban and rural construction	Ministry of Housing and Urban-Rural Development National Development and Reform Commission	2022.7.13	By 2025	the photovoltaic coverage rate on the roofs of new public institutional buildings and new factory buildings is expected to reach 50%.	N	http://www.gov.cn/zhengce/zhengceku/2022-07/13/content_5700752.htm
						By 2025	the proportion of renewable energy used in urban buildings is expected to reach 8%.	Y
						By 2030	the proportion of electricity used in building energy consumption is expected to exceed 65%.	Y
			Advanced Energy Efficiency Level, Energy Saving Level and Access Level of Key Energy-Using Products and Equipment (2024 Edition)	National Development and Reform Commission Ministry of Industry and Information Technology Ministry of Finance Ministry of Housing and Urban-Rural Development State Administration for Market Regulation National Energy Administration	2024.2.07	Since 2024	update minimum energy performance standards for across 43 products, 8 of which are cooling products.	N	https://www.ndrc.gov.cn/xxgk/zcfb/ghxwj/202402/t20240207_1364001.html
			Action Plan to Promote Replacemnet of Consumer Goods	The Ministry of Commerce and 14 other ministrie	2024.03.27	By 2025	The volume of scrapped car recycling will increase by 50% compared to 2023, and the recycling volume of used household appliances will grow by 15% compared to 2023.	N	https://www.gov.cn/zhengce/zhengceku/202404/content_6945069.htm
						By 2027	the volume of scrapped car recycling will double compared to 2023, the volume of used car transactions will increase by 45% compared to 2023, and the recycling volume of used household appliances will grow by 30% compared to 2023.	N
			GB 19577-2024:Minimum allowable values of the energy efficiency and energy efficiency grades for heat pumps and water chillers	National Standards Committee	2024.07.03	Since 2025	updates minimum energy performance standards for heat pumps and water chillers.	N	https://www.chinesestandard.net/Related.aspx/GB19577-2024?Redirect
		The action for promoting green and low-carbon transportation	New Energy Automobile Industry Development Plan (2021-2035)	State Council	2020.10.20	By 2025	Achieve an average electricity consumption of new passenger BEVs ≥12.0 kWh/ 100 km	Y	https://www.gov.cn/zhengce/content/2020-11/02/content_5556716.htm
						By 2025	sales of new energy vehicles will account for about 20% of total new car sales.	Y
			Mandatory National Standard: Fuel Consumption Limits for Passenger Cars (GB 19578-2021)	Ministry of Industry and Information Technology	2021.02.23	By 2025	The average fuel consumption of new cars for passenger cars will be reduced to 4.0 liters/100 kilometres.	Y	https://www.gov.cn/xinwen/2021-02/23/content_5588420.htm
						By 2030	The average fuel consumption of new cars for passenger cars will be reduced to 3.2 litres/100 km	Y
			The "14th Five-Year Plan for the Development of Modern Comprehensive Transportation System	State Council	2022.1.18	By 2025	new energy buses are expected to account for 72% of all surface public transport vehicles in urban areas.	Y	http://www.gov.cn/xinwen/2022-01/18/content_5669136.htm
						By 2025	the carbon dioxide emission intensity of the transportation sector is expected to decrease by 5%.	Y
						By 2025	Adiitioally, there are other 13 non-carbon related numerical targets to support model transport development	N
			The "14th Five-Year" Development Plan for Green Transportation	Ministry of Transport	2022.1.21	By 2025	The target for the reduction in carbon dioxide (CO2) emissions from operational vehicles per unit of transport turnover is a 5% decrease compared to 2020 levels by the end of 2025.	N	http://www.gov.cn/zhengce/zhengceku/2022-01/21/content_5669662.htm
						By 2025	The target for operational ships is to achieve a 3.5% reduction in carbon dioxide (CO2) emissions per unit of transport turnover compared to 2020 levels by the end of 2025.	N
						By 2025	The target for operational ships is to achieve a 7% reduction in the total amount of nitrogen oxides (NOx) emissions compared to 2020 levels	N
						By 2025	the target percentages for new energy vehicles in various sectors are: Urban Public Transportation: 72%;Taxis (including ride-hailing services): 35%;Urban Logistics and Delivery: 20%	Y
						By 2025	the target for international container hub ports is for 60% of the clean energy trucks (including those powered by new energy) to be used.	N
						By 2025	there are other 3 planning numerical targets for transport infrastructure expansion	N
		The action for promoting circular economy in carbon mitigation purpose	14th Five-Year Plan for Circular Economy Development	National Development and Reform Commission	2021.7.01	By 2025	Resource output efficiency will increase by about 20% compared to 2020.	N	http://www.gov.cn/zhengce/zhengceku/2021-07/07/content_5623077.htm
							Energy consumption per unit of GDP will decrease by 13.5% compared to 2020.	Y
							Water usage per unit of GDP will decrease by about 16% compared to 2020.	N
							The comprehensive utilization rate of crop straw will be maintained at over 86%.	N
							The comprehensive utilization rate of major solid waste will reach 60%.	N
							The comprehensive utilization rate of construction waste will reach 60%.	N
							The amount of recycled steel will reach 320 million tons.	Y
							The amount of recycled paper will reach 60 million tons.	N
							The production of recycled non-ferrous metals will reach 20 million tons, including: Recycled copper: 4 million tons Recycled aluminum: 11.5 million tons Recycled lead: 2.9 million tons	N
							The output value of the resource recycling industry will reach 5 trillion yuan.	N
			Implementation Plan on Accelerating the Promotion of Comprehensive Utilization of Industrial Resources	Eight Ministies including the Ministry of Industry and Information Technology	2022.2.10	By 2025	Achieving a comprehensive utilization rate of 57% for major industrial solid waste, with specific targets of: 73% for smelting slag 73% for industrial by-product gypsum Effective improvement in the utilization of red mud.	N	http://www.gov.cn/zhengce/zhengceku/2022-02/11/content_5673067.htm
						By 2025	Utilization of key recycled resource varieties will exceed 480 million tons, including: 320 million tons of recycled steel 20 million tons of recycled non-ferrous metals 60 million tons of recycled paper	N
		The action for advancing green and low-carbon technology innovation	14th Five-Year Plan for Scientific and Technological Innovation in the Energy Sector	National Energy Administration Ministry of Science and Technology	2022.4.2	No numerical target			http://www.gov.cn/zhengce/zhengceku/2022-04/03/content_5683361.htm
			Science and Technology Supporting Carbon Peak Carbon Neutralization Implementation Plan (2022-2030)	Ministry of Science and Technology and other nine ministries	2022.8.18	By 2025	the goal is to achieve a 20% reduction in the energy consumption per unit of carbon dioxide captured compared to 2020, with a further reduction of 30% by 2030. Additionally, significant decreases in carbon capture costs are expected.	N	http://www.gov.cn/zhengce/zhengceku/2022-08/18/content_5705865.htm
		The action for consolidating and enhancing carbon sequestration capacity	Guidelines for the Verification and Verification of Forestry Carbon Sequestration Projects (GB/T 41198-2021)	State Administration for Market Regulation and the Standardization Administration of China	2021.12.31	No numerical targets			http://www.filq.com/wj/txm/tbz/zg/%E5%9B%BD%E5%AE%B6%E6%A0%87%E5%87%86%EF%BC%9A%E6%9E%97%E4%B8%9A%E7%A2%B3%E6%B1%87%E9%A1%B9%E7%9B%AE%E5%AE%A1%E5%AE%9A%E5%92%8C%E6%A0%B8%E8%AF%81%E6%8C%87%E5%8D%97.pdf
			Accounting Method for the Economic Value of Ocean Carbon Sequestration（HY／T0349－2022）	Ministry of Natural Resources	2022.2.21	No numerical targets			http://www.filq.com/wj/txm/tbz/zg/%E3%80%8A%E4%B8%AD%E5%9B%BD%E6%B5%B7%E6%B4%8B%E7%A2%B3%E6%B1%87%E7%BB%8F%E6%B5%8E%E4%BB%B7%E5%80%BC%E6%A0%B8%E7%AE%97%E6%A0%87%E5%87%86%E3%80%8B%E5%BE%81%E6%B1%82%E6%84%8F%E8%A7%81%E7%A8%BF%E5%8F%8A%E7%BC%96%E5%88%B6%E8%AF%B4%E6%98%8E%20.pdf
		The action for promoting all regions to peak carbon dioxide emissions hierarchically and orderly	Provincial carbon reduction policies	All local governments	Since 2021	beyond the scope of policy quantification in this study			See local government websites
		The action for green and low-carbon society	Work Plan for Strengthening the Construction of Carbon Peak Carbon Neutral Higher Education Talent Training System	the Ministry of Education	2022.3.7	beyond the scope of policy quantification in this study			http://www.moe.gov.cn/srcsite/A08/s7056/202205/t20220506_625229.html
			119	non quantifiable in TIAM
			87	quantifiable in TIAM

## Sheet: Num_Targets_Implemented_TIAM
			Table X Overview of China’s quantifiable climate targets and the key characteristics underlying the confidence assessment for their realisation
			Target year	Target	Impacting scope	Policy coverage frequency	Policy-making authority	Current progress (By 2023/2024)	Source	Progress to date	Governance level	Clearly stated in a five-year plan	Credibility score	Cluster
			By 2025	Energy consumption per unit of GDP will be lowered by 13.5% from the 2020 level	Overall	Working Guidance for Carbon Dioxide Peaking and Carbon Neutrality in Full and Faithful Implementation of the New Development Philosophy The Action Plan for Carbon Peaking Before 2030 14th Five-Year Plan on Modern Energy System Planning The "14th Five-Year Plan" Comprehensive Work Plan for Energy Conservation and Emission Reduction 14th Five-Year Plan for Circular Economy Development	CPC Central Committee&State council	By 2023, energy intensity has reduced by 7.6% from 2020 level, based on the data published by National Bureau of Statistics of China	https://www.stats.gov.cn/english/	0.562963	3	2	0.781481	MEDIUM
			By 2025	Carbon dioxide (CO2) emissions per unit of GDP will be lowered by 18% from the 2020 level	Overall	Working Guidance for Carbon Dioxide Peaking and Carbon Neutrality in Full and Faithful Implementation of the New Development Philosophy The Action Plan for Carbon Peaking Before 2030 14th Five-Year Plan on Modern Energy System Planning	CPC Central Committee&State council	By 2023, carbon intensity has reduced by 6.3% from 2020 level, based on the data published by National Bureau of Statistics of China	https://www.stats.gov.cn/english/	0.35	3	2	0.675	MEDIUM
			By 2025	The share of non-fossil energy consumption will have reached around 20%;	Overall	Working Guidance for Carbon Dioxide Peaking and Carbon Neutrality in Full and Faithful Implementation of the New Development Philosophy The Action Plan for Carbon Peaking Before 2030 14th Five-Year Plan on Modern Energy System Planning The "14th Five-Year Plan" Comprehensive Work Plan for Energy Conservation and Emission Reduction 2024-2025 Energy Conservation and Carbon Reduction Action Plan	CPC Central Committee&State council	By 2023, the share of non-fossil fuels in primary energy consumption has increased to 17.5%, according to mid-term evaluation report of the National Development and Reform Commission (15.3% in 2020)	https://www.ndrc.gov.cn/fzggw/wld/zsj/zyhd/202312/t20231227_1362958.html	0.468085	3	2	0.734043	MEDIUM
			By 2025	Electricity accounting for about 30% of end-use energy consumption.	Overall	14th Five-Year Plan on Modern Energy System Planning	NDRC,NEA	Both IEA and Chinese government estimate that around 28% of final energy consumption is electricity by 2023 (27% in 2020)	https://www.gov.cn/yaowen/liebiao/202403/content_6941779.htm https://www.iea.org/countries/china/energy-mix	0.333333	2	2	0.566667	LOW
			By 2025	Total renewable energy consumption will reach about 1 billion tons of standard coal(~29,300PJ).	Overall	14th Five-Year Plan of Renewable Energy	NDRC	Total renewable energy consumption has increased to 0.75 billion tons of standard coal in 2021, from 0.68 million tons(19927PJ) in 2020 (achievement published by government); By 2023, renewable energy generation has reached 3 trillion kilowatt-hours. Estimate using an average efficiency of 40%, it needs 27000PJ renewables	https://www.gov.cn/xinwen/2022-06/24/content_5697606.htm https://www.gov.cn/lianbo/bumen/202312/content_6921782.htm	0.921502	2	2	0.860751	HIGH
			By 2025	Total renewable energy consumption will reach about 18% of primary energy consumption.	Overall	14th Five-Year Plan of Renewable Energy	NDRC	Total renewable energy consumption has increased to 17.9% of primary energy consumption in 2023, from 13.6% in 2020 (achievement published by government)	https://www.gov.cn/xinwen/2022-06/24/content_5697606.htm https://www.stats.gov.cn/sj/sjjd/202409/t20240918_1956558.html	0.977273	2	2	0.888636	HIGH
			By 2025	Renewable energy will account for more than 50% of the incremental in primary energy consumption.	Overall	14th Five-Year Plan of Renewable Energy	NDRC	No evidence	-	0.5	2	2	0.65	MEDIUM
			By 2025	The non-electric utilization of renewable energy (including geothermal heating, biomass heating, biomass fuels, and solar thermal utilization) will reach over 60 million tons of standard coal(~1758 PJ)..	Overall	14th Five-Year Plan of Renewable Energy	NDRC	No evidence	-	0.5	2	2	0.65	MEDIUM
			By 2025	Annual crude oil production will stabilize at around 200 million tons.	Upstream	14th Five-Year Plan on Modern Energy System Planning Seven-Year Exploration and Production Increase Action Plans	NDRC	In 2023, 208.91 million tons of crude petroleum oil were produced, according to NBSC.	https://www.stats.gov.cn/english/PressRelease/202402/t20240201_1947122.html	1.04	2	2	0.92	ACHIEVED
			By 2025	Annual natural gas production will exceed 230 billion cubic meters.	Upstream	14th Five-Year Plan on Modern Energy System Planning Seven-Year Exploration and Production Increase Action Plans	NDRC	In 2023, 232 bcm gas were produced domestically, according to NBSC.	https://www.stats.gov.cn/english/PressRelease/202402/t20240201_1947122.html	1.0087	2	2	0.904348	ACHIEVED
			By 2025	Produce 100,000 to 200,000 tons of hydrogen from renewable energy annually	Upstream	Medium- and long-term plan for the development of the hydrogen energy industry (2021-2035)	NDRC	China installed a cumulative 1 GW of electrolyzer capacity in 2023.Rystad Energy projetced the installation of approximately 2.5 gigawatts (GW) of hydrogen electrolyzer capacity by the end of 2024. This capacity is expected to produce 220,000 tonnes per annum (tpa) of green hydrogen.	https://www.rystadenergy.com/news/china-hydrogen-targets	1.1	2	1	0.85	ACHIEVED
			By 2025	Total installed power generation capacity will reach approximately 3,000 gigawatts (GW)	Power sector	14th Five-Year Plan on Modern Energy System Planning	NDRC	From Statista 2024, total installed power generation capacity will reach approximately 2920 gigawatts (GW) by 2023(2200GW in 2020)	https://www.statista.com/statistics/302269/china-installed-power-generation-capacity/#:~:text=Power%20production%20capacity%20in%20China%202010%2D2023&text=As%20of%202023%2C%20approximately%202%2C920,growth%20over%20the%20past%20decade.	0.9	2	2	0.85	HIGH
			By 2025	The proportion of non-fossil energy in power generation will reach about 39%.	Power sector	14th Five-Year Plan on Modern Energy System Planning 2024-2025 Energy Conservation and Carbon Reduction Action Plan	NDRC	In 2023, non-fossil share of power generation increased to 34.46% from 32% in 2020	https://ember-climate.org/countries-and-regions/countries/china/	0.351429	2	2	0.575714	LOW
			By 2025	The operational installed capacity of nuclear power will reach approximately 70 GW	Power sector	14th Five-Year Plan on Modern Energy System Planning	NDRC	According to Chinese government and EIA, the operational installed capacity of nuclear power has reached approximately 53.2 GW by 2024 (50GW in 2020)	https://www.eia.gov/todayinenergy/detail.php?id=61927#:~:text=In%20the%20past%2010%20years,are%20under%20construction%20in%20China. https://www.ndrc.gov.cn/fggz/hjyzy/jnhnx/202303/t20230302_1350587.html#:~:text=%E5%88%9D%E6%AD%A5%E6%A0%B8%E7%AE%97%EF%BC%8C2022%E5%B9%B4%E5%85%A8%E5%9B%BD,%E7%94%B5%E5%8A%9B%E6%B6%88%E8%B4%B9%E9%87%8F%E5%A2%9E%E9%95%BF3.6%25%E3%80%82	0.16	2	2	0.48	LOW
			By 2025	Power generation from renewable energy will reach approximately 3,300TWh	Power sector	14th Five-Year Plan of Renewable Energy	NDRC	By 2023, power generation from renewable energy reach approximately 2894 TWh (2214 TWH in 2020)	https://ember-climate.org/countries-and-regions/countries/china/	0.626151	2	2	0.713076	MEDIUM
			By 2025	33% of electricity will be generated from renewables	Power sector	14th Five-Year Plan of Renewable Energy	NDRC	The NEA's evaluation report showed renewable electricity consumption totalled 2,444.6 terawatt-hours in 2021, accounting for 29.4% of total electricity consumption. Ember shows China's renewable energy sources generated 35% of the country's electricity in 2023. (28.8% in 2020)	https://www.spglobal.com/commodityinsights/en/market-insights/latest-news/energy-transition/092322-china-could-exceed-renewables-generation-target-of-33-by-2025	1.47619	2	2	1.1381	ACHIEVED
			By 2025	18% of electricity from non-hydropower renewables	Power sector	14th Five-Year Plan of Renewable Energy	NDRC	In 2023, electricity from non-hydropower renewables has increased to 16.45% (10% in 2020)	https://ember-climate.org/countries-and-regions/countries/china/	0.80625	2	2	0.803125	HIGH
			By 2025	Approximately 40 gigawatts of additional hydro power capacity will be installed from 2020 (360GW)	Power sector	The Action Plan for Carbon Peaking Before 2030	State Council	Installed hydro capacity had climbed 18% to 422 million kilowatts (kW) by the end of 2023 from 358 million kW at the end of 2019, according to the National Bureau of Statistics (NBS).	https://www.reuters.com/markets/commodities/chinas-hydro-generators-wait-rains-come-2024-03-22/#:~:text=Installed%20hydro%20capacity%20had%20climbed,conditions%20based%20on%20capacity%20additions. https://www.hydropower.org/region-profiles/east-asia-and-pacific#:~:text=Generation%20by%20hydropower%20(2023),have%20projects%20in%20the%20pipeline.	1.55	3	1	1.175	ACHIEVED
			By 2025	The proportion of EAF in iron and steel will be increased to 15%	Industry	Implementation Plan for Synergizing the Reduction of Pollution and Carbon Emission 2024-2025 Energy Conservation and Carbon Reduction Action Plan Guideline on promoting the high-quality development of the iron and steel industry The Implementation Plan for Carbon Peaking in the Industrial Sector	NDRC	As of January 2024, China has installed 151 million metric tons per year of operating EAF capacity, exceeding the 143 MMt/y needed to achieve the 15% EAF production target, according to a March 19 report by Global Energy Monitor.	https://www.spglobal.com/marketintelligence/en/news-insights/latest-news-headlines/china-installs-enough-low-carbon-steelmaking-capacity-to-meet-2025-target-80897669	1.05594	2	1	0.827972	ACHIEVED
			By 2025	The amount of recycled steel will reach 320 million tons updated as 300 million tons in newest policy in 2024).	Industry	14th Five-Year Plan for Circular Economy Development 2024-2025 Energy Conservation and Carbon Reduction Action Plan	NDRC	China recycled 260 MMt of scrap steel in 2023 (210mmt in 2020)	https://www.spglobal.com/marketintelligence/en/news-insights/latest-news-headlines/china-installs-enough-low-carbon-steelmaking-capacity-to-meet-2025-target-80897669	0.454545	2	2	0.627273	MEDIUM
			By 2025	Reduce CO2 emissions per unit of industrial added value by 18%.	Industry	14th Five-Year Plan on Industrial Green Development	Ministries	No evidence	-	0.5	1	2	0.55	LOW
			By 2025	Domestic capacity for primary refining of crude oil will be kept below 1 billion metric tons(20 million b/d) , and the utilization rate of production capacity for main products will rise to 80% or more.	Industry	The Action Plan for Carbon Peaking Before 2030 2024-2025 Energy Conservation and Carbon Reduction Action Plan Special Action Plan for Energy Conservation and Carbon Reduction in the Oil Refining Industry	State Council	In 2023, the country's refining capacity stands at more than 18.29 million b/d, surging by more than 50% from around 12 million b/d in 2022.Though China still plans to add over 1 million b/d of refining capacity in the future, there's a high possibility that China will manage its total refining capacity to around 20 million b/d by 2025	https://www.spglobal.com/commodityinsights/en/market-insights/latest-news/oil/102623-chinas-reshaping-of-refining-sector-in-line-with-new-green-development-guidelines#:~:text=For%20example%2C%20the%20key%20target,peak%20carbon%20emissions%20by%202030.	0.9145	3	1	0.85725	HIGH
			By 2025	Decrease comprehensive energy consumption per ton of steel by over 2% compared to 2020 ( in 2024, it has been updated to derease energy intensity by 2% compared to 2023)	Industry	Guideline on promoting the high-quality development of the iron and steel industry 14th Five-Year Plan for the Development of the Raw Materials Industry	Ministries	In 2022, the energy intensity of iron and steel increased by 1.7%	https://www.ndrc.gov.cn/fggz/hjyzy/jnhnx/202303/t20230302_1350587.html#:~:text=%E5%88%9D%E6%AD%A5%E6%A0%B8%E7%AE%97%EF%BC%8C2022%E5%B9%B4%E5%85%A8%E5%9B%BD,%E7%94%B5%E5%8A%9B%E6%B6%88%E8%B4%B9%E9%87%8F%E5%A2%9E%E9%95%BF3.6%25%E3%80%82	0	1	1	0.2	LOW
			By 2025	The energy consumption per unit of industrial added value in large-scale industries is expected to decrease by 13.5% compared to 2020.	Industry	Action Plan for Industrial Energy Efficiency Improvement The Implementation Plan for Carbon Peaking in the Industrial Sector	Ministries	No evidence	-	0.5	1	1	0.45	LOW
			By 2025	Electricity is expected to account for approximately 30% of the industrial end-use energy consumption.	Industry	Action Plan for Industrial Energy Efficiency Improvement	Ministries	According to IEA data, industrial electrification increased by 2% from 2020-2023 (27% in 2020)	https://www.iea.org/countries/china/efficiency-demand#how-is-energy-used-in-industry-and-services-in-china https://www.gov.cn/yaowen/liebiao/202403/content_6941779.htm	0.666667	1	1	0.533333	LOW
			By 2025	Carbon intensity of transportation will be reduced by 5% compared to 2020.	Transport	2024-2025 Energy Conservation and Carbon Reduction Action Plan The "14th Five-Year Plan for the Development of Modern Comprehensive Transportation System	State Council	No evidence	-	0.5	3	2	0.75	MEDIUM
			By 2025	Achieve an average electricity consumption of new passenger BEVs ≥12.0 kWh/ 100 km	Transport	New Energy Automobile Industry Development Plan (2021-2035)	State Council	From the investigation of International Council on Clean Transportation in 2023, the technology efficiency of BEVs in China's real wrold ranges from 8.8-14.1 kwh/km. The target level is within the range.	https://theicct.org/wp-content/uploads/2023/04/Passenger-cars-BEVs-real-world_final.pdf	0.5	3	1	0.65	MEDIUM
			By 2025	The average fuel consumption of new cars for passenger cars will be reduced to 4.0 liters/100 km.	Transport	Mandatory National Standard: Fuel Consumption Limits for Passenger Cars (GB 19578-2021)	Ministry	As it is mandatroy standard, we assumed it could be fully implemented	-	1	1	1	0.7	ACHIEVED
			By 2025	New energy buses are expected to account for 72% of all surface public transport vehicles in urban areas.	Transport	The "14th Five-Year Plan for the Development of Modern Comprehensive Transportation System	State Council	From Ministry of Transport , New energy buses has accounted for 81.9% of all surface public transport vehicles in urban areas.	https://xxgk.mot.gov.cn/2020/guanli/	1.1375	3	2	1.06875	ACHIEVED
			By 2025	Sales of new energy vehicles will account for about 20% of total new car sales	Transport	14th Five-Year Plan on Modern Energy System Planning The "14th Five-Year Plan" Comprehensive Work Plan for Energy Conservation and Emission Reduction New Energy Automobile Industry Development Plan (2021-2035)	NDRC	According to IEA data, the sales share is 38% in 2023(11% in 2020)	https://www.iea.org/reports/global-ev-outlook-2024/trends-in-electric-cars	1.9	2	2	1.2	ACHIEVED
			By 2025	Share of electricity consumption in building energy consumption will exceed 55%	Building	14th Five-Year Plan for Building Energy Efficiency and Green Building Development	Ministries	According to 2023 Chinese government evaluation report, share of electricity consumption in building energy consumption is 48.1% (30% in 2020)	https://www.gov.cn/yaowen/liebiao/202403/content_6941779.htm	0.72	1	2	0.66	MEDIUM
			By 2025	Renewable energy use in urban buildings will reach 8%.	Building	The Action Plan for Carbon Peaking Before 2030 2024-2025 Energy Conservation and Carbon Reduction Action Plan 14th Five-Year Plan for Building Energy Efficiency and Green Building Development Implementation plan for carbon peaking in urban and rural construction	State Council	No evidence	-	0.5	3	2	0.75	MEDIUM
			By 2030	Lower CO2 emissions per unit of GDP by over 65% from the 2005 level	Overall	China’s Achievements, New Goals and New Measures for Nationally Determined Contributions Working Guidance for Carbon Dioxide Peaking and Carbon Neutrality in Full and Faithful Implementation of the New Development Philosophy The Action Plan for Carbon Peaking Before 2030 14th Five-Year Plan on Modern Energy System Planning	CCP&State Council	According to IEA data, China's carbon intenstity has been lowered by 50% from the 2005 level	https://www.iea.org/data-and-statistics/data-tools/greenhouse-gas-emissions-from-energy-data-explorer https://www.carbonbrief.org/guest-post-why-china-is-set-to-significantly-overachieve-its-2030-climate-goals/	0.769231	3	2	0.884615	HIGH
			By 2030	Increase the share of non-fossil fuels in primary energy consumption to around 25%	Overall	China’s Achievements, New Goals and New Measures for Nationally Determined Contributions Working Guidance for Carbon Dioxide Peaking and Carbon Neutrality in Full and Faithful Implementation of the New Development Philosophy The Action Plan for Carbon Peaking Before 2030 14th Five-Year Plan on Modern Energy System Planning	CCP&State Council	By 2023, the share of non-fossil fuels in primary energy consumption has increased to 17.5%, according to mid-term evaluation report of the National Development and Reform Commission((15.9% in 2020)	https://www.ndrc.gov.cn/fzggw/wld/zsj/zyhd/202312/t20231227_1362958.html	0.175824	3	2	0.587912	LOW
			By 2030	Approximately 40 gigawatts of additional hydro power capacity will be installed from 2020 (360GW)	Power sector	The Action Plan for Carbon Peaking Before 2030 14th Five-Year Plan of Renewable Energy	State Council	Installed hydro capacity had climbed 18% to 422 million kilowatts (kW) by the end of 2023 from 358 million kW at the end of 2019, according to the National Bureau of Statistics (NBS).)	https://www.reuters.com/markets/commodities/chinas-hydro-generators-wait-rains-come-2024-03-22/#:~:text=Installed%20hydro%20capacity%20had%20climbed,conditions%20based%20on%20capacity%20additions. https://www.hydropower.org/region-profiles/east-asia-and-pacific#:~:text=Generation%20by%20hydropower%20(2023),have%20projects%20in%20the%20pipeline.	0.775	3	2	0.8875	HIGH
			By 2030	The total installed capacity of wind and solar power will be improved to over 1.2 billion kilowatts	Power sector	China’s Achievements, New Goals and New Measures for Nationally Determined Contributions Working Guidance for Carbon Dioxide Peaking and Carbon Neutrality in Full and Faithful Implementation of the New Development Philosophy The Action Plan for Carbon Peaking Before 2030 14th Five-Year Plan of Renewable Energy	CCP&State Council	Guardian shows, China is on track to reach 1,200GW of installed wind and solar capacity by the end of 2024, six years ahead of the government’s target.	https://www.theguardian.com/world/article/2024/jul/11/china-building-twice-as-much-wind-and-solar-power-as-rest-of-world-report	1	3	2	1	ACHIEVED
			By 2030	The share of incremental vehicles fueled by new and clean energy will reach around 40%	Transport	The Action Plan for Carbon Peaking Before 2030 Implementation Plan for Synergizing the Reduction of Pollution and Carbon Emission	State Council	According to IEA data, the sales share is 38% in 2023(11% in 2020)	https://www.iea.org/reports/global-ev-outlook-2024/trends-in-electric-cars	0.931034	3	1	0.865517	HIGH
			By 2030	China will strive to reach a peak in petroleum consumption for land transportation before 2030.	Transport	The Action Plan for Carbon Peaking Before 2030	State Council	No evidence	-	0.5	3	2	0.75	MEDIUM
			By 2030	The average fuel consumption of new cars for passenger cars will be reduced to 3.2 litres/100 km	Transport	Mandatory National Standard: Fuel Consumption Limits for Passenger Cars (GB 19578-2021)	Ministries	As it is mandatroy standard, we assumed it could be fully implemented	-	1	1	1	0.7	ACHIEVED
			By 2030	100% public vehicles will be electrified	Transport	14th Five-Year Plan of Green Transportation Development Action Plan for Continuous Improvement of Air Quality New Energy Automobile Industry Development Plan (2021-2035)	State Council	From Ministry of Transport , New energy buses has accounted for 81.9% of all surface public transport vehicles in urban areas.	https://xxgk.mot.gov.cn/2020/guanli/	0.819	3	2	0.9095	HIGH
			By 2030	The proportion of EAF in iron and steel will be increased to over 20%	Industry	Implementation Plan for Synergizing the Reduction of Pollution and Carbon Emission The Implementation Plan for Carbon Peaking in the Industrial Sector	Ministries	As of January 2024, China has installed 151 million metric tons per year of operating EAF capacity, exceeding the 143 MMt/y needed to achieve the 15% EAF production target, according to a March 19 report by Global Energy Monitor.	https://www.spglobal.com/marketintelligence/en/news-insights/latest-news-headlines/china-installs-enough-low-carbon-steelmaking-capacity-to-meet-2025-target-80897669	0.5	1	1	0.45	LOW
			By 2030	The proportion of electricity used in building energy consumption is expected to exceed 65%.	Building	Implementation plan for carbon peaking in urban and rural construction	Ministries	According to 2023 Chinese government evalutaion report, share of electricity consumption in building energy consumption is 48.1%((30% in 2020)	https://www.gov.cn/yaowen/liebiao/202403/content_6941779.htm	0.514286	1	1	0.457143	LOW
			By 2060	Improve the proportion of non-fossil fuels in energy consumption up to over 80%.	Overall	China’s Mid-Century Long-Term Low Greenhouse Gas Emission Development Strategy Working Guidance for Carbon Dioxide Peaking and Carbon Neutrality in Full and Faithful Implementation of the New Development Philosophy	CCP&State Council	By 2023, the share of non-fossil fuels in primary energy consumption has increased to 17.5%, according to mid-term evaluation report of the National Development and Reform Commission (15.9% in 2020)	-	0.0249	3	1	0.41245	LOW

## Sheet: Data for Figure 3.b
			Table X Overview of China’s quantifiable climate targets and the key characteristics underlying the confidence assessment for their realisation
			Target year	Target	Impacting scope	Progress to date	Governance level	Clearly stated in a five-year plan	Credibility score	Cluster
			By 2025	Energy consumption per unit of GDP will be lowered by 13.5% from the 2020 level	Overall	0.562963	3	2	0.781481	MEDIUM
			By 2025	Carbon dioxide (CO2) emissions per unit of GDP will be lowered by 18% from the 2020 level	Overall	0.35	3	2	0.675	MEDIUM
			By 2025	The share of non-fossil energy consumption will have reached around 20%;	Overall	0.468085	3	2	0.734043	MEDIUM
			By 2025	Electricity accounting for about 30% of end-use energy consumption.	Overall	0.333333	2	2	0.566667	LOW
			By 2025	Total renewable energy consumption will reach about 1 billion tons of standard coal(~29,300PJ).	Overall	0.921502	2	2	0.860751	HIGH
			By 2025	Total renewable energy consumption will reach about 18% of primary energy consumption.	Overall	0.977273	2	2	0.888636	HIGH
			By 2025	Renewable energy will account for more than 50% of the incremental in primary energy consumption.	Overall	0.5	2	2	0.65	MEDIUM
			By 2025	The non-electric utilization of renewable energy (including geothermal heating, biomass heating, biomass fuels, and solar thermal utilization) will reach over 60 million tons of standard coal(~1758 PJ)..	Overall	0.5	2	2	0.65	MEDIUM
			By 2025	Annual crude oil production will stabilize at around 200 million tons.	Upstream	1.04	2	2	0.92	ACHIEVED
			By 2025	Annual natural gas production will exceed 230 billion cubic meters.	Upstream	1.0087	2	2	0.904348	ACHIEVED
			By 2025	Produce 100,000 to 200,000 tons of hydrogen from renewable energy annually	Upstream	1.1	2	1	0.85	ACHIEVED
			By 2025	Total installed power generation capacity will reach approximately 3,000 gigawatts (GW)	Power sector	0.9	2	2	0.85	HIGH
			By 2025	The proportion of non-fossil energy in power generation will reach about 39%.	Power sector	0.351429	2	2	0.575714	LOW
			By 2025	The operational installed capacity of nuclear power will reach approximately 70 GW	Power sector	0.16	2	2	0.48	LOW
			By 2025	Power generation from renewable energy will reach approximately 3,300TWh	Power sector	0.626151	2	2	0.713076	MEDIUM
			By 2025	33% of electricity will be generated from renewables	Power sector	1.47619	2	2	1.1381	ACHIEVED
			By 2025	18% of electricity from non-hydropower renewables	Power sector	0.80625	2	2	0.803125	HIGH
			By 2025	Approximately 40 gigawatts of additional hydro power capacity will be installed from 2020 (360GW)	Power sector	1.55	3	1	1.175	ACHIEVED
			By 2025	The proportion of EAF in iron and steel will be increased to 15%	Industry	1.05594	2	1	0.827972	ACHIEVED
			By 2025	The amount of recycled steel will reach 320 million tons updated as 300 million tons in newest policy in 2024).	Industry	0.454545	2	2	0.627273	MEDIUM
			By 2025	Reduce CO2 emissions per unit of industrial added value by 18%.	Industry	0.5	1	2	0.55	LOW
			By 2025	Domestic capacity for primary refining of crude oil will be kept below 1 billion metric tons(20 million b/d) , and the utilization rate of production capacity for main products will rise to 80% or more.	Industry	0.9145	3	1	0.85725	HIGH
			By 2025	Decrease comprehensive energy consumption per ton of steel by over 2% compared to 2020 ( in 2024, it has been updated to derease energy intensity by 2% compared to 2023)	Industry	0	1	1	0.2	LOW
			By 2025	The energy consumption per unit of industrial added value in large-scale industries is expected to decrease by 13.5% compared to 2020.	Industry	0.5	1	1	0.45	LOW
			By 2025	Electricity is expected to account for approximately 30% of the industrial end-use energy consumption.	Industry	0.666667	1	1	0.533333	LOW
			By 2025	Carbon intensity of transportation will be reduced by 5% compared to 2020.	Transport	0.5	3	2	0.75	MEDIUM
			By 2025	Achieve an average electricity consumption of new passenger BEVs ≥12.0 kWh/ 100 km	Transport	0.5	3	1	0.65	MEDIUM
			By 2025	The average fuel consumption of new cars for passenger cars will be reduced to 4.0 liters/100 km.	Transport	1	1	1	0.7	ACHIEVED
			By 2025	New energy buses are expected to account for 72% of all surface public transport vehicles in urban areas.	Transport	1.1375	3	2	1.06875	ACHIEVED
			By 2025	Sales of new energy vehicles will account for about 20% of total new car sales	Transport	1.9	2	2	1.2	ACHIEVED
			By 2025	Share of electricity consumption in building energy consumption will exceed 55%	Building	0.72	1	2	0.66	MEDIUM
			By 2025	Renewable energy use in urban buildings will reach 8%.	Building	0.5	3	2	0.75	MEDIUM
			By 2030	Lower CO2 emissions per unit of GDP by over 65% from the 2005 level	Overall	0.769231	3	2	0.884615	HIGH
			By 2030	Increase the share of non-fossil fuels in primary energy consumption to around 25%	Overall	0.175824	3	2	0.587912	LOW
			By 2030	Approximately 40 gigawatts of additional hydro power capacity will be installed from 2020 (360GW)	Power sector	0.775	3	2	0.8875	HIGH
			By 2030	The total installed capacity of wind and solar power will be improved to over 1.2 billion kilowatts	Power sector	1	3	2	1	ACHIEVED
			By 2030	The share of incremental vehicles fueled by new and clean energy will reach around 40%	Transport	0.931034	3	1	0.865517	HIGH
			By 2030	China will strive to reach a peak in petroleum consumption for land transportation before 2030.	Transport	0.5	3	2	0.75	MEDIUM
			By 2030	The average fuel consumption of new cars for passenger cars will be reduced to 3.2 litres/100 km	Transport	1	1	1	0.7	ACHIEVED
			By 2030	100% public vehicles will be electrified	Transport	0.819	3	2	0.9095	HIGH
			By 2030	The proportion of EAF in iron and steel will be increased to over 20%	Industry	0.5	1	1	0.45	LOW
			By 2030	The proportion of electricity used in building energy consumption is expected to exceed 65%.	Building	0.514286	1	1	0.457143	LOW
			By 2060	Improve the proportion of non-fossil fuels in energy consumption up to over 80%.	Overall	0.0249	3	1	0.41245	LOW
