# Supplementary material for: The global implications of uncertainty in China's climate policy delivery
Source: Research Square preprint supplement (doi:10.21203/rs.3.rs-6699194/v1), 2025-07-14
Supplement: Supplementary file 2 [file 631efbf7b5ae1d95c3248061.docx]

# The global implications of uncertainty in China's climate policy delivery: supplementary information

## SI Section 1: Policy credibility assessment of China climate policies

When seeking to explore future energy scenarios, policy credibility has started to receive attention in the context of achieving a low-carbon transition and meeting climate targets 1–5. Existing Chinese policy-related scenarios studies have mainly focused on overarching NDC or Net zero targets, often assuming the delivery of policy targets while overlooking the uncertainties associated with delayed, partial, or failed implementation—particularly at the sectoral level. This paper takes a first step toward closing that research gap by systematically assessing the credibility of China’s sectoral climate and energy targets, providing a more realistic basis for evaluating whether the country is on track to meet its decarbonisation goals.

The definition of ‘policy credibility’ varies in the literature 6–8. Furthermore, there is no standard assessment framework for policy credibility across studies4,5. In this study, we follow Rogelj, J. *et al* 3, who define credibility as “the level of confidence in a target (net-zero targets) delivery”, and extend their net-zero target credibility assessment to national-level targets in China. Policies reviewed in this study encompass all Chinese government policy documents related to energy and climate issued from central government between 2020 and 2025, including action plans, working scheme, strategy documents, guiding opinions, guidelines, standards and so on. The credibility rating in Rogelj et al.’s study is based on three criteria: (i) whether a country’s net-zero target is legally binding, (ii) whether it is accompanied by a published implementation plan, and (iii) whether the country’s current policy trajectory is on track to significantly reduce emissions by 2030. In the context of China, we conducted credibility rating based on the following three policy characteristics:

**Governance level at which policy is set:** we replace the "legally binding" criterion with the governance level at which the policy is set as a more nuanced and accurate criteria of credibility in the Chinese context. China’s governance system is hierarchical and predominantly driven by executive orders rather than acts of parliament9,10. Legislation and policies related to climate change are often issued as soft regulations, rather than hard laws11, which shifts the focus from legal enforceability to the authority and level of governance behind a policy12,13 (see SI Figure 1) . The "dual-carbon" targets (peaking carbon emissions by 2030 and achieving carbon neutrality by 2060) are an example of policies set at the highest levels of authority. These targets are endorsed by the Chinese Communist Party (CCP) and the State Council and are made legally binding at the national level. In contrast, policies issued by the National Development and Reform Commission (NDRC) or other ministries are often non-binding guidelines or frameworks. Therefore, to better evaluate the credibility of all official targets from all levels of government, it cannot be assessed simply using the "legally binding" as is common in other countries. Instead, the level of authority behind the policy—whether it is set by the CCP, the State Council, the NDRC, or ministries—plays a significant role in determining its enforceability and alignment with the overarching dual-carbon goals. Policies issued by higher authorities, such as the CCP and the State Council, typically receive stronger institutional support, better funding, and more rigorous monitoring, marking them more likely to secure compliance and achieve their intended outcomes14. In contrast, lower-level policies often depend on the interpretation and implementation capacity of subnational governments, which can result in inconsistencies and gaps in execution15. Therefore, we assume the achievement of the climate target with higher-level endorsement and multiple reaffirmations from top to down is more credible.


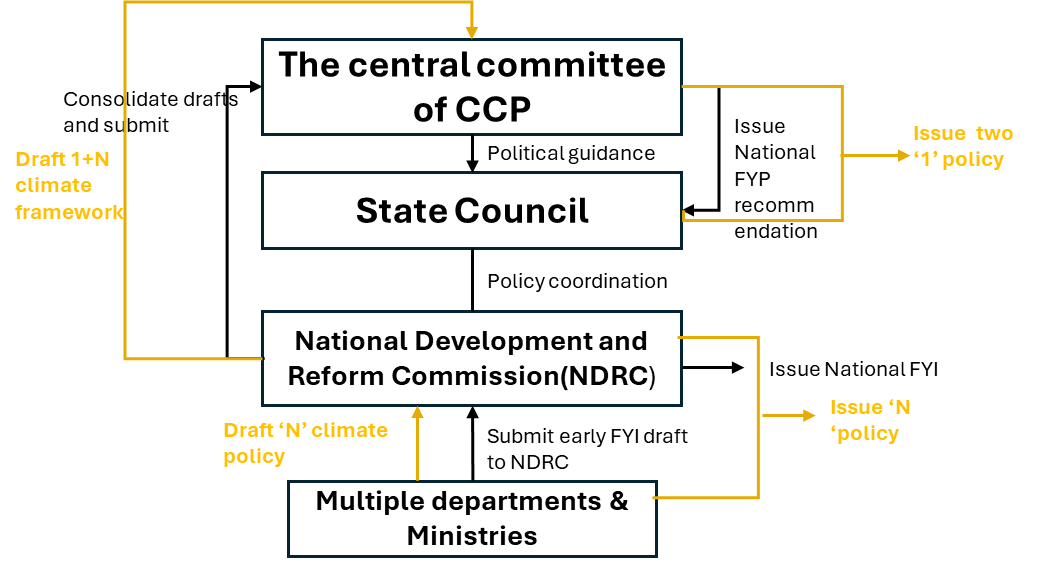


SI Figure 1. Overview of China’s climate governance framework led by the central government, adapted based on Teng and Wang12, Li et al.16

**Clearly stated in a five-year plan:**

The 14th Five-Year Plan (FYP) (2020–2025) plays a pivotal role in China’s climate governance by setting clear targets, defining strategic initiatives, and embedding environmental objectives into the nation’s overall development agenda. By integrating climate objectives into the broader economic planning framework, the FYP ensures that climate governance aligns with the country’s development priorities, fosters coordinated action across various levels of government and sectors and outlines specific strategies for achieving the dual-carbon targets, such as promoting renewable energy and advancing low-carbon technologies17. Moreover, the targets set in the 14th FYP are typically cautious and realistic, closely tied to government performance evaluations. This connection enhances their executive nature, making them more actionable and subject to evaluation at the end of the five-year period18. Such evaluation and report provide mechanisms for accountability and progress monitoring. Therefore, we assume that climate targets clearly stated in a Five-Year Plan are more actionable and credible due to their integration into performance evaluations, alignment with broader development priorities, and a pragmatic approach to implementation.

**Progress to date:** With China’s 14th Five-Year Plan nearing completion, evaluating the historical progress of climate targets will provide a foundation for developing new policies, plans, and targets for the next five years. Given the uncertainties in tracking broad goals like carbon neutrality and peak emissions—as well as the need for further model quantification—our assessment focuses exclusively on quantifiable, trackable, and statistically measurable targets (see SI Table 2). All evidence sources on progress are provided in the supplementary data. Progress is evaluated based on achievements since the targets were first set, calculated as follows:

We assume that targets demonstrating positive progress thus far are more likely to be achieved on time, creating a foundation for setting more ambitious goals in the future.

The credibility score for each target is calculated based on the three characteristics mentioned earlier. Since progress to date is the most direct criterion for evaluating target achievement, it is assigned the highest weight of 0.5. Governance level is weighted at 0.3, while the target's inclusion in the 14th Five-Year Plan is weighted at 0.2. After normalizing all raw scores and applying the weighted calculations, a final credibility score is determined for each target.

All targets within the assessment scope are rated, as shown in Figure 2. If a target has been achieved ahead of schedule—meaning its progress to date exceeds 100%—it is categorized as "Achieved." For targets still in progress and not yet achieved, they are classified into three categories based on their score distribution: a credibility score of 0.8–1.0 is considered "High," 0.6–0.8 is "Medium," and below 0.6 is "Low." An exception is made for targets that fell behind schedule in official mid-term evaluation19 but were replaced with more conservative versions in 2024 policy updates20. These are rated “Low” regardless of other indicators, reflecting reduced policy robustness. Specifically, we conducted this credibility assessment by following the steps outlined below:


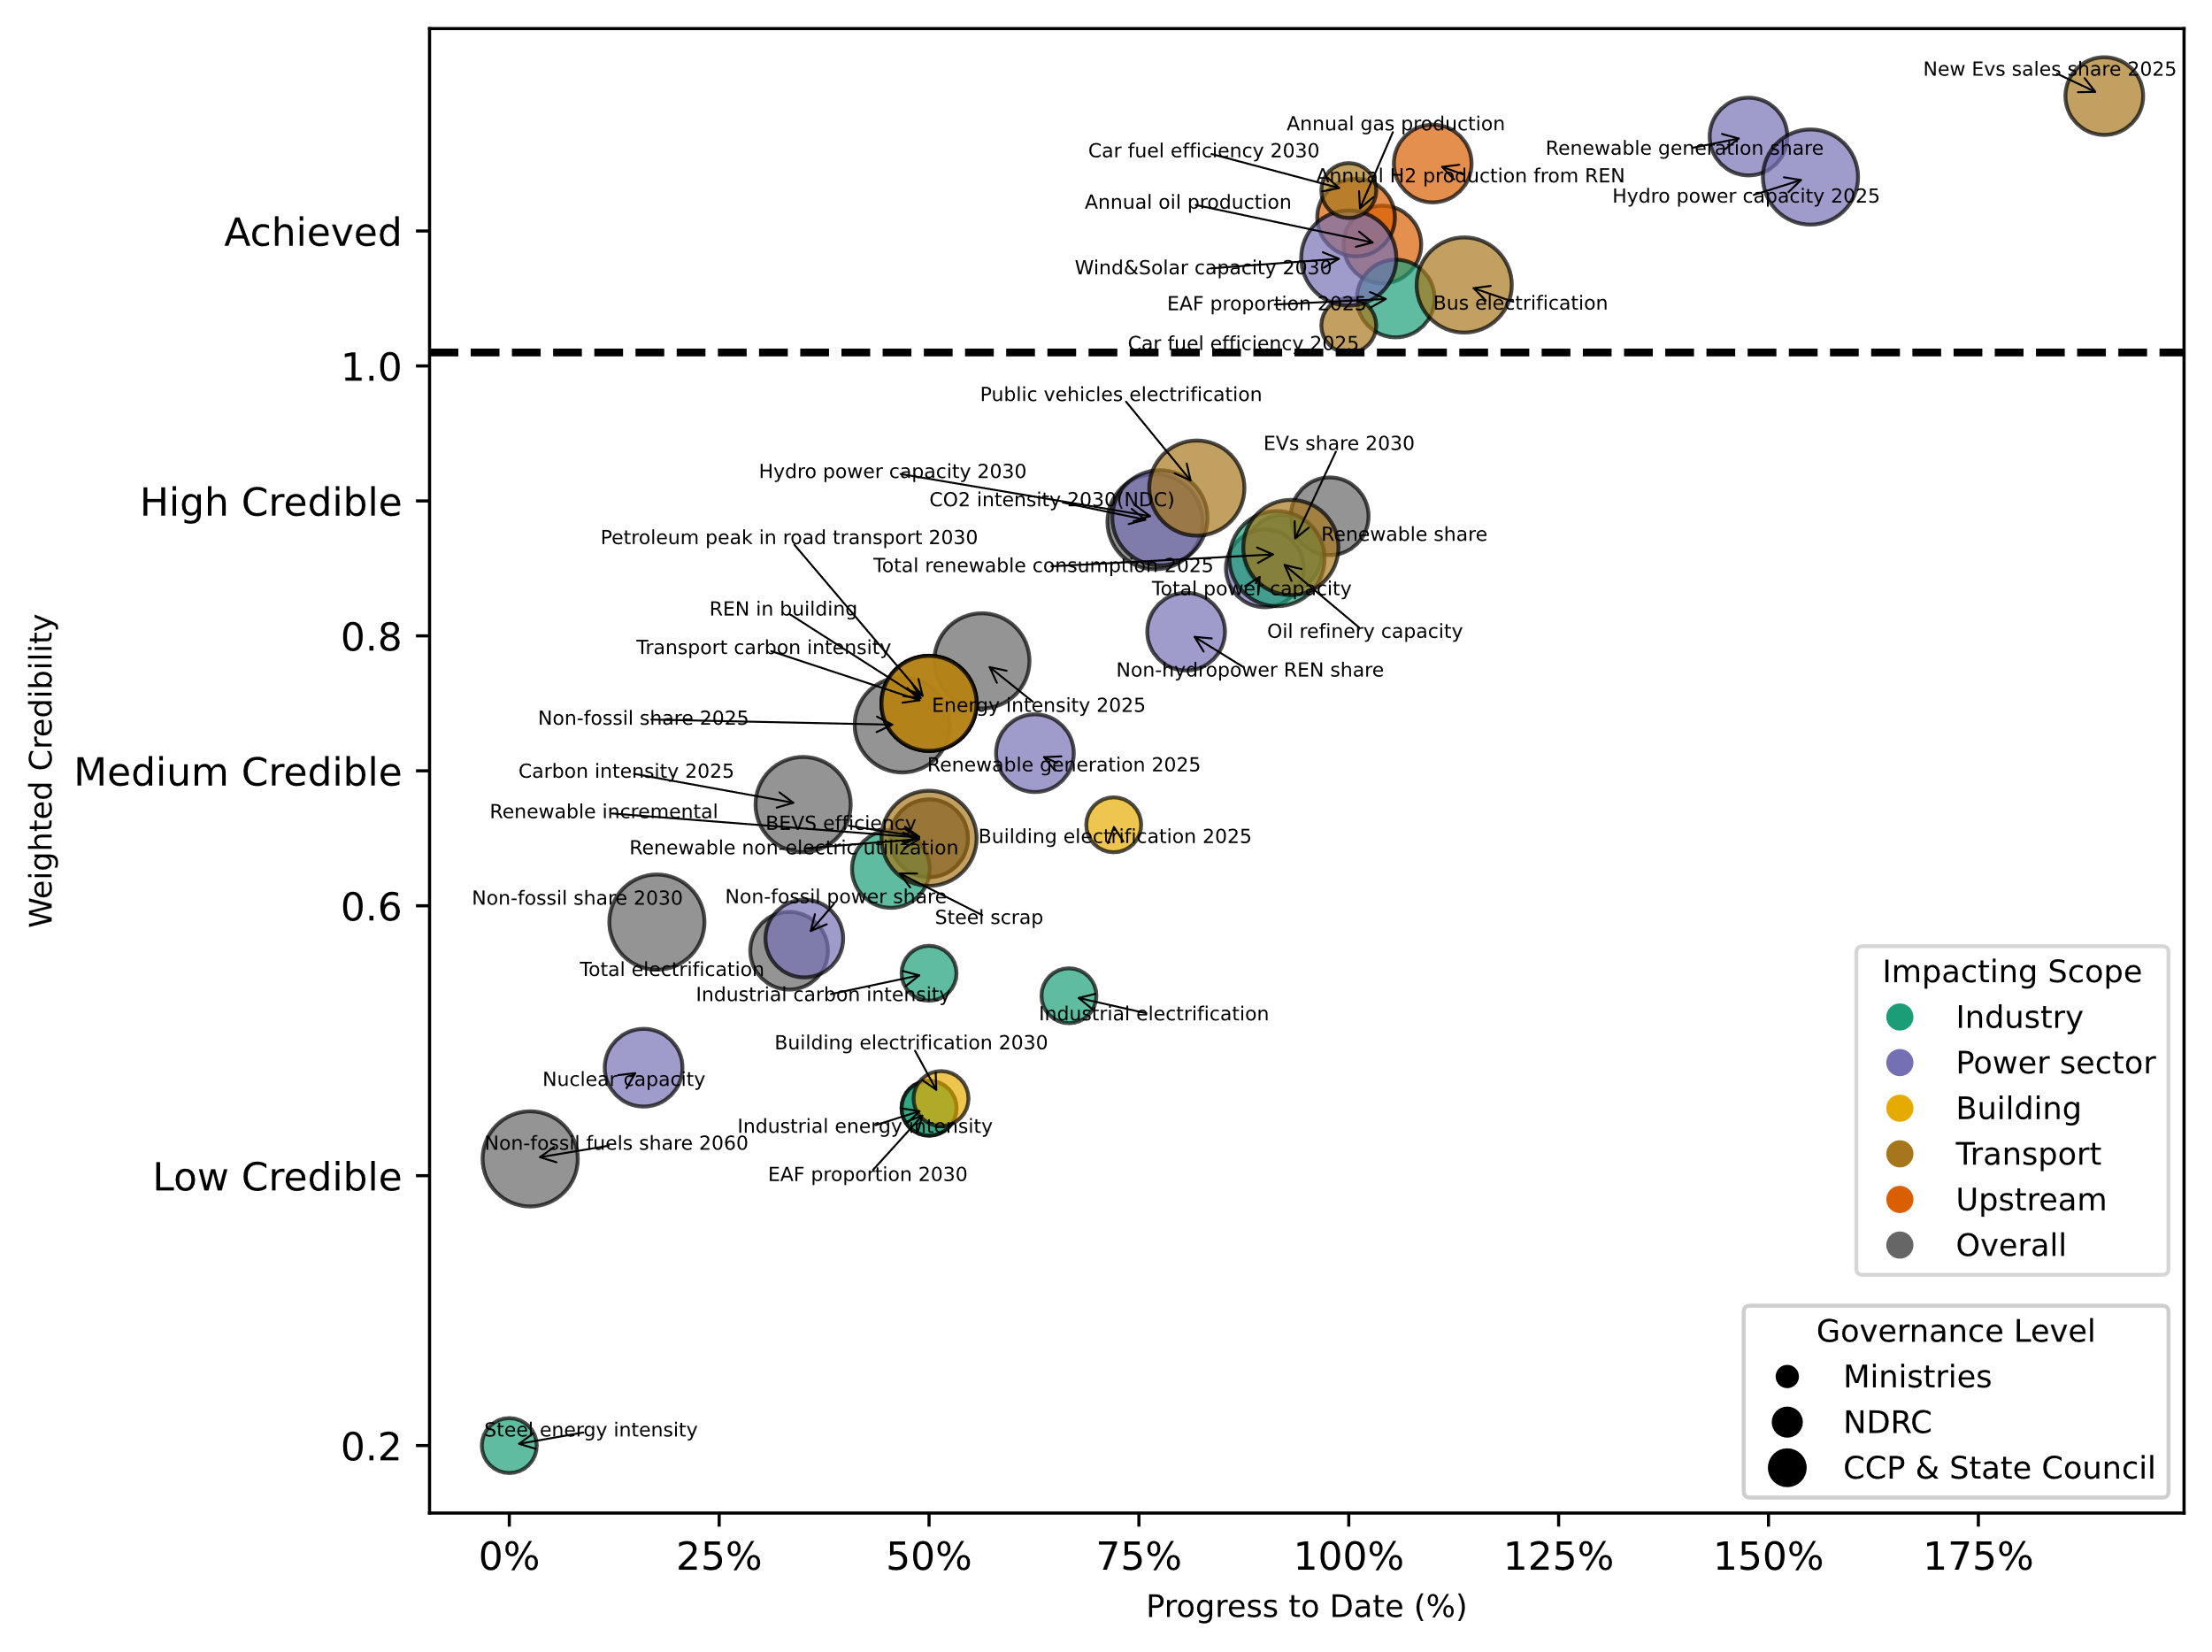


SI Figure 2. Credibility assessment of China’s climate and energy goals across various sectors

### Step 1: Identifying the scope of climate policies and their associated targets

Climate change as a key issue is not only reflected in the NDC and net zero targets but also in the recent five-year plans and other high-level government documents involving energy and emissions governance. The policies reviewed in this study are those issued from 2020 to July 2024 and include:

- **Policies within the "1+N" climate policy framework:** The "1+N" climate policy framework is a strategic plan introduced to achieve its goals of carbon peak before 2030 and carbon neutrality before 2060. The "1" refers to the guiding document or the top-level policy guideline that sets the overarching goals and principles for China’s climate actions. The "N" represents a series of specific action plans and measures that will be implemented across different sectors and regions to achieve the goals outlined in the "1" document. **T**he “1” policy *The Action Plan for Carbon Peaking Before 2030* explicitly proposes 10 actions to achieve a carbon peak by 2030 (see SI Table 1). However, within the scope of “N”, there is no official definition of the policies associated with the 10 actions. Therefore, this analysis starts with a comprehensive review of China’s climate related policies, according to the 1+N climate policy framework. We dive into the N policies to identify what government actions belong to this scope. Improving the policy transparency and enhancing the understanding the climate efforts from Chinese government is another contribution from our assessment.

SI Table 1. The "1+N" climate policy framework

| **Carbon peak before 2030 and carbon net zero before 2060** | |
| --- | --- |
| “1”: Top-level working guidance | |
| Working Guidance for Carbon Dioxide Peaking and Carbon Neutrality in Full and Faithful Implementation of the New Development Philosophy | The Action Plan for Carbon Peaking Before 2030 |
| “N”: underpinning 10 key actions | |
| The action for green and low-carbon energy transition | The action for promoting circular economy in carbon mitigation purpose |
| The action for energy saving carbon emission mitigation and efficiency improvement | The action for advancing green and low-carbon technology innovation |
| The action for peaking carbon dioxide emissions in industry sector | The action for consolidating and enhancing carbon sink |
| The action for peaking carbon dioxide emissions in urban-rural development area | The action for green and low-carbon society |
| The action for promoting green and low-carbon transportation | The action for promoting all regions to peak carbon dioxide emissions hierarchically and orderly |

- **Energy and emission policies within 14th Five-Year Plan:** The 14th Five-Year Plan refers to the national development strategy and economic plan covering the years 2021 to 2025, focusing on economy growth, technological innovation, and sustainability. Since China submitted its NDC target, green and low-carbon development has also been incorporated into the overall plans for national economic and social development 21. Some of the policies in national five-year plan are also supportive of ‘1+N’ climate policy. Therefore, we integrated them into the subcategory of 1+N framework.
- **Ad-hoc energy policies, planning, and standards for different sectors**, including buildings, transport, power, and industry. To ensure comprehensive coverage, we also reviewed the IEA policy dataset and Climate action tracker (CAT) and integrated them into the ten actions under 1+N climate policy framework (see supplementary data).

### Step 2: Estimating credibility ratings across different policy targets

To ensure that the targets we reviewed are quantifiable using TIAM, we excluded three types of targets before conducting the credibility assessment:

- Targets that cannot be applied due to the limited commodities and technologies available in TIAM, such as "by 2025, the forest coverage rate will reach approximately 25%, and the forest stock volume will reach 19 billion cubic meters."
- Targets where the mentioned indicators lack a clear definition, such as "by 2025, the energy efficiency level of newly constructed residential buildings in urban areas will improve by 30%."
- Targets where the impact is at a regional level or is vague, such as "by 2025, coal consumption will decrease by 10% in the Beijing-Tianjin-Hebei region and by 5% in the Yangtze River Delta." Finally, the credibility of each numerical target is rated as the table shows:

**SI Table 2. Overview of China’s quantifiable climate targets and the key characteristics underlying the confidence assessment for their realisation**

| **Target year** | **Target** | **Impacting scope** | **Policy coverage frequency** | **Policy-making authority** | **Current progress (By 2023/2024)** | **Progress to date (weight=0.5)** | **Governance level (weight= 0.3)** | **Clearly stated in a five-year plan (weight=0.2)** | **Weighted Credibility** | **Credibility Cluster** |
| --- | --- | --- | --- | --- | --- | --- | --- | --- | --- | --- |
| By 2025 | Energy consumption per unit of GDP will be lowered by **13.5%** from the 2020 level | Overall | Working Guidance for Carbon Dioxide Peaking and Carbon Neutrality in Full and Faithful Implementation of the New Development Philosophy The Action Plan for Carbon Peaking Before 2030  14th Five-Year Plan on Modern Energy System Planning The "14th Five-Year Plan" Comprehensive Work Plan for Energy Conservation and Emission Reduction 14th Five-Year Plan for Circular Economy Development | CCP Central Committee State council | By 2023, energy intensity had reduced by 7.6% from the 2020 level, based on data published by the National Bureau of Statistics of China. | 56.30% | 3 | 2 | **0.78** | **MEDIUM** |
| By 2025 | Carbon dioxide (CO₂) emissions per unit of GDP will be lowered by 18% from the 2020 level. | Overall | Working Guidance for Carbon Dioxide Peaking and Carbon Neutrality in Full and Faithful Implementation of the New Development Philosophy The Action Plan for Carbon Peaking Before 2030  14th Five-Year Plan on Modern Energy System Planning | CCP Central Committee State council | By 2023, carbon intensity had reduced by 6.3% from the 2020 level, based on data published by the National Bureau of Statistics of China. | 35.00% | 3 | 2 | **0.68** | **MEDIUM** |
| By 2025 | The share of non-fossil energy consumption will have reached around 20%. | Overall | Working Guidance for Carbon Dioxide Peaking and Carbon Neutrality in Full and Faithful Implementation of the New Development Philosophy The Action Plan for Carbon Peaking Before 2030  14th Five-Year Plan on Modern Energy System Planning The "14th Five-Year Plan" Comprehensive Work Plan for Energy Conservation and Emission Reduction 2024-2025 Energy Conservation and Carbon Reduction Action Plan | CPC Central Committee State council | By 2023, the share of non-fossil fuels in primary energy consumption had increased to 17.5%, according to the mid-term evaluation report of the National Development and Reform Commission (15.3% in 2020). | 46.81% | 3 | 2 | **0.73** | **MEDIUM** |
| By 2025 | Electricity will account for about 30% of end-use energy consumption. | Overall | 14th Five-Year Plan on Modern Energy System Planning | NDRC, NEA | Both the IEA and the Chinese government estimate that around 28% of final energy consumption was electricity by 2023 (27% in 2020). | 33.33% | 2 | 2 | **0.57** | **LOW** |
| By 2025 | Total renewable energy consumption will reach about 1 billion tons of standard coal (~29,300 PJ). | Overall | 14th Five-Year Plan of Renewable Energy | NDRC | Total renewable energy consumption increased to 0.75 billion tons of standard coal in 2021, from 0.68 billion tons (19,927 PJ) in 2020 (according to government data). By 2023, renewable energy generation had reached 3 trillion kilowatt-hours. Estimating with an average efficiency of 40%, this would require about 27,000 PJ of renewables. | 92.15% | 2 | 2 | **0.86** | **HIGH** |
| By 2025 | Total renewable energy consumption will reach about 18% of primary energy consumption. | Overall | 14th Five-Year Plan of Renewable Energy | NDRC | Total renewable energy consumption increased to 17.9% of primary energy consumption in 2023, from 13.6% in 2020 (according to government data). | 97.73% | 2 | 2 | **0.89** | **HIGH** |
| By 2025 | Renewable energy will account for more than 50% of the increase in primary energy consumption. | Overall | 14th Five-Year Plan of Renewable Energy | NDRC | No evidence | 50.00% | 2 | 2 | **0.65** | **MEDIUM** |
| By 2025 | The non-electric utilization of renewable energy (including geothermal heating, biomass heating, biomass fuels, and solar thermal utilization) will reach over 60 million tons of standard coal (~1,758 PJ). | Overall | 14th Five-Year Plan of Renewable Energy | NDRC | No evidence | 50.00% | 2 | 2 | **0.65** | **MEDIUM** |
| By 2025 | Annual crude oil production will stabilize at around 200 million tons. | Upstream | 14th Five-Year Plan on Modern Energy System Planning Seven-Year Exploration and Production Increase Action Plans | NDRC | In 2023, 208.91 million tons of crude oil were produced, according to the NBSC. | 104.00% | 2 | 2 | **0.92** | **ACHIEVED** |
| By 2025 | Annual natural gas production will exceed 230 billion cubic meters. | Upstream | 14th Five-Year Plan on Modern Energy System Planning Seven-Year Exploration and Production Increase Action Plans | NDRC | In 2023, 232 billion cubic meters (bcm) of gas were produced domestically, according to the NBSC. | 101% | 2 | 2 | **0.90** | **ACHIEVED** |
| By 2025 | 100,000 to 200,000 tons of hydrogen will be produced from renewable energy annually. | Upstream | Medium- and long-term plan for the development of the hydrogen energy industry (2021-2035) | NDRC | China installed a cumulative 1 GW of electrolyser capacity in 2023. Rystad Energy projected the installation of approximately 2.5 gigawatts (GW) of hydrogen electrolyser capacity by the end of 2024. This capacity is expected to produce 220,000 tonnes per annum (tpa) of green hydrogen. | 110.00% | 2 | 1 | **0.85** | **ACHIEVED** |
| By 2025 | Total installed power generation capacity will reach approximately 3,000 gigawatts (GW). | Power sector | 14th Five-Year Plan on Modern Energy System Planning | NDRC | According to Statista (2024), total installed power generation capacity reached approximately 2,920 gigawatts (GW) by 2023 (2,200 GW in 2020). | 90.00% | 2 | 2 | **0.85** | **HIGH** |
| By 2025 | The proportion of non-fossil energy in power generation will reach about 39%. | Power sector | 14th Five-Year Plan on Modern Energy System Planning 2024-2025 Energy Conservation and Carbon Reduction Action Plan | NDRC | In 2023, the non-fossil share of power generation increased to 34.46%, up from 32% in 2020. | 35.14% | 2 | 2 | **0.58** | **LOW** |
| By 2025 | The operational installed capacity of nuclear power will reach approximately 70 GW. | Power sector | 14th Five-Year Plan on Modern Energy System Planning | NDRC | According to the Chinese government and the EIA, the operational installed capacity of nuclear power had reached approximately 53.2 GW by 2024 (50 GW in 2020). | 16.00% | 2 | 2 | **0.48** | **LOW** |
| By 2025 | Power generation from renewable energy will reach approximately 3,300 TWh. | Power sector | 14th Five-Year Plan of Renewable Energy | NDRC | By 2023, power generation from renewable energy had reached approximately 2,894 TWh (2,214 TWh in 2020). | 62.62% | 2 | 2 | **0.71** | **MEDIUM** |
| By 2025 | 33% of electricity will be generated from renewables. | Power sector | 14th Five-Year Plan of Renewable Energy | NDRC | The NEA's evaluation report showed that renewable electricity consumption totalled 2,444.6 terawatt-hours in 2021, accounting for 29.4% of total electricity consumption. Ember reported that China's renewable energy sources generated 35% of the country's electricity in 2023 (28.8% in 2020). | 147.62% | 2 | 2 | **1.14** | **ACHIEVED** |
| By 2025 | 18% of electricity will come from non-hydropower renewables. | Power sector | 14th Five-Year Plan of Renewable Energy | NDRC | In 2023, electricity from non-hydropower renewables had increased to 16.45% (10% in 2020). | 80.63% | 2 | 2 | **0.80** | **HIGH** |
| By 2025 | approximately 40 gigawatts of additional hydropower capacity will be installed compared to 2020 (360 GW). | Power sector | The Action Plan for Carbon Peaking Before 2030 | State Council | Installed hydropower capacity had climbed 18% to 422 million kilowatts (kW) by the end of 2023, from 358 million kW at the end of 2019, according to the National Bureau of Statistics (NBS). | 155.00% | 3 | 1 | **1.18** | **ACHIEVED** |
| By 2025 | The proportion of EAF in iron and steel production will increase to 15%. | Industry | Implementation Plan for Synergizing the Reduction of Pollution and Carbon Emission 2024-2025 Energy Conservation and Carbon Reduction Action Plan Guideline on promoting the high-quality development of the iron and steel industry The Implementation Plan for Carbon Peaking in the Industrial Sector | NDRC | As of January 2024, China had installed 151 million metric tons per year of operating EAF capacity, exceeding the 143 million metric tons per year needed to achieve the 15% EAF production target, according to a March 19 report by Global Energy Monitor. | 105.59% | 2 | 1 | **0.83** | **ACHIEVED** |
| By 2025 | The amount of recycled steel will reach 320 million tons (updated to 300 million metric tons in the newest policy in 2024). | Industry | 14th Five-Year Plan for Circular Economy Development 2024-2025 Energy Conservation and Carbon Reduction Action Plan | NDRC | China recycled 260 million metric tons (MMt) of scrap steel in 2023 (210 MMt in 2020). | 45.45% | 2 | 2 | **0.63** | **MEDIUM** |
| By 2025 | CO₂ emissions per unit of industrial added value will be reduced by 18%. | Industry | 14th Five-Year Plan on Industrial Green Development | Ministries | No evidence | 50.00% | 1 | 2 | **0.55** | **LOW** |
| By 2025 | Domestic capacity for primary refining of crude oil will be kept below 1 billion metric tons (20 million b/d), and the utilization rate of production capacity for main products will rise to 80% or more. | Industry | The Action Plan for Carbon Peaking Before 2030  2024-2025 Energy Conservation and Carbon Reduction Action Plan Special Action Plan for Energy Conservation and Carbon Reduction in the Oil Refining Industry | State Council | In 2023, the country's refining capacity stood at more than 18.29 million b/d, surging by more than 50% from around 12 million b/d in 2022. Although China still plans to add over 1 million b/d of refining capacity in the future, there is a high possibility that it will manage its total refining capacity to around 20 million b/d by 2025. | 91.45% | 3 | 1 | **0.86** | **HIGH** |
| By 2025 | Comprehensive energy consumption per ton of steel will decrease by over 2% compared to 2020 (updated in 2024 to a 2% decrease in energy intensity compared to 2023). | Industry | Guideline on promoting the high-quality development of the iron and steel industry 14th Five-Year Plan for the Development of the Raw Materials Industry | Ministries | In 2022, the energy intensity of iron and steel increased by 1.7%. | 0.00% | 1 | 1 | **0.20** | **LOW** |
| By 2025 | The energy consumption per unit of industrial added value in large-scale industries is expected to decrease by 13.5% compared to 2020. | Industry | Action Plan for Industrial Energy Efficiency Improvement The Implementation Plan for Carbon Peaking in the Industrial Sector | Ministries | No evidence | 50.00% | 1 | 1 | **0.45** | **LOW** |
| By 2025 | Electricity is expected to account for approximately 30% of industrial end-use energy consumption. | Industry | Action Plan for Industrial Energy Efficiency Improvement | Ministries | According to IEA data, industrial electrification increased by 2% from 2020 to 2023 (27% in 2020). | 66.67% | 1 | 1 | **0.53** | **LOW** |
| By 2025 | The carbon intensity of transportation will be reduced by 5% compared to 2020. | Transport | 2024-2025 Energy Conservation and Carbon Reduction Action Plan The "14th Five-Year Plan for the Development of Modern Comprehensive Transportation System | State Council | No evidence | 50.00% | 3 | 2 | **0.75** | **MEDIUM** |
| By 2025 | Achieve an average electricity consumption of new passenger BEVs of ≤12.0 kWh/100 km. | Transport | New Energy Automobile Industry Development Plan (2021-2035) | State Council | According to an investigation by the International Council on Clean Transportation in 2023, the real-world technology efficiency of BEVs in China ranged from 8.8 to 14.1 kWh/100 km. The target level falls within this range. | 50.00% | 3 | 1 | **0.65** | **MEDIUM** |
| By 2025 | The average fuel consumption of new passenger cars will be reduced to 4.0 litres/100 km. | Transport | Mandatory National Standard: Fuel Consumption Limits for Passenger Cars (GB 19578-2021) | Ministry | As it is a mandatory standard, we assume it will be fully implemented. | 100.00% | 1 | 1 | **0.70** | **ACHIEVED** |
| By 2025 | New energy buses are expected to account for 72% of all surface public transport vehicles in urban areas. | Transport | The "14th Five-Year Plan for the Development of Modern Comprehensive Transportation System | State Council | According to the Ministry of Transport, new energy buses had accounted for 81.9% of all surface public transport vehicles in urban areas. | 113.75% | 3 | 2 | **1.07** | **ACHIEVED** |
| By 2025 | sales of new energy vehicles will account for about 20% of total new car sales. | Transport | 14th Five-Year Plan on Modern Energy System Planning The "14th Five-Year Plan" Comprehensive Work Plan for Energy Conservation and Emission Reduction New Energy Automobile Industry Development Plan (2021-2035) | NDRC | According to IEA data, the sales share was 38% in 2023 (11% in 2020). | 190.00% | 2 | 2 | **1.20** | **ACHIEVED** |
| By 2025 | The share of electricity consumption in building energy consumption will exceed 55%. | Building | 14th Five-Year Plan for Building Energy Efficiency and Green Building Development | Ministries | According to the 2023 Chinese government evaluation report, the share of electricity consumption in building energy consumption was 48.1% (30% in 2020). | 72.00% | 1 | 2 | **0.66** | **MEDIUM** |
| By 2025 | Renewable energy use in urban buildings will reach 8%. | Building | The Action Plan for Carbon Peaking Before 2030  2024-2025 Energy Conservation and Carbon Reduction Action Plan 14th Five-Year Plan for Building Energy Efficiency and Green Building Development Implementation plan for carbon peaking in urban and rural construction | State Council | No evidence | 50.00% | 3 | 2 | **0.75** | **MEDIUM** |
| By 2030 | Lower CO₂ emissions per unit of GDP by over 65% from the 2005 level. | Overall | China’s Achievements, New Goals and New Measures for Nationally Determined Contributions Working Guidance for Carbon Dioxide Peaking and Carbon Neutrality in Full and Faithful Implementation of the New Development Philosophy The Action Plan for Carbon Peaking Before 2030  14th Five-Year Plan on Modern Energy System Planning | CCP & State Council | According to IEA data, China’s carbon intensity had been lowered by 50% from the 2005 level by 2023. | 76.92% | 3 | 2 | **0.88** | **HIGH** |
| By 2030 | Increase the share of non-fossil fuels in primary energy consumption to around 25%. | Overall | China’s Achievements, New Goals and New Measures for Nationally Determined Contributions Working Guidance for Carbon Dioxide Peaking and Carbon Neutrality in Full and Faithful Implementation of the New Development Philosophy The Action Plan for Carbon Peaking Before 2030  14th Five-Year Plan on Modern Energy System Planning | CCP &State Council | By 2023, the share of non-fossil fuels in primary energy consumption had increased to 17.5%, according to the mid-term evaluation report of the National Development and Reform Commission (15.9% in 2020). | 17.58% | 3 | 2 | **0.59** | **LOW** |
| By 2030 | Approximately 40 gigawatts of additional hydropower capacity will be installed from 2025, reaching 440 GW. | Power sector | The Action Plan for Carbon Peaking Before 2030  14th Five-Year Plan of Renewable Energy | State Council | Installed hydropower capacity had climbed 18% to 422 million kilowatts (kW) by the end of 2023, up from 358 million kW at the end of 2019, according to the National Bureau of Statistics (NBS). | 77.50% | 3 | 2 | **0.89** | **HIGH** |
| By 2030 | The total installed capacity of wind and solar power will increase to over 1.2 billion kilowatts. | Power sector | China’s Achievements, New Goals and New Measures for Nationally Determined Contributions Working Guidance for Carbon Dioxide Peaking and Carbon Neutrality in Full and Faithful Implementation of the New Development Philosophy The Action Plan for Carbon Peaking Before 2030  14th Five-Year Plan of Renewable Energy | CCP & State Council | The Guardian reports that China is on track to reach 1,200 GW of installed wind and solar capacity by the end of 2024, six years ahead of the government’s target. | 100.00% | 3 | 2 | **1.00** | **ACHIEVED** |
| By 2030 | The share of incremental vehicles fueled by new and clean energy will reach around 40%. | Transport | The Action Plan for Carbon Peaking Before 2030  Implementation Plan for Synergizing the Reduction of Pollution and Carbon Emission | State Council | According to IEA data, the sales share was 38% in 2023 (11% in 2020). | 93.10% | 3 | 1 | **0.87** | **HIGH** |
| By 2030 | China will strive to reach a peak in petroleum consumption for land transportation before 2030. | Transport | The Action Plan for Carbon Peaking Before 2030 | State Council | No evidence | 50.00% | 3 | 2 | **0.75** | **MEDIUM** |
| By 2030 | The average fuel consumption of new passenger cars will be reduced to 3.2 litres/100 km. | Transport | Mandatory National Standard: Fuel Consumption Limits for Passenger Cars (GB 19578-2021) | Ministries | As it is a mandatory standard, we assumed it would be fully implemented. | 100.00% | 1 | 1 | **0.70** | **ACHIEVED** |
| By 2030 | 100% of public vehicles will be electrified. | Transport | 14th Five-Year Plan of Green Transportation Development  Action Plan for Continuous Improvement of Air Quality New Energy Automobile Industry Development Plan (2021-2035) | State Council | According to the Ministry of Transport, new energy buses had accounted for 81.9% of all surface public transport vehicles in urban areas (70% in 2020). | 81.90% | 3 | 2 | **0.91** | **HIGH** |
| By 2030 | The proportion of EAF in iron and steel production will increase to over 20%. | Industry | Implementation Plan for Synergizing the Reduction of Pollution and Carbon Emission The Implementation Plan for Carbon Peaking in the Industrial Sector | Ministries | As of January 2024, China had installed 151 million metric tons per year of operating EAF capacity, exceeding the 143 million metric tons per year needed to achieve the 15% EAF production target, according to report by Global Energy Monitor. | 50.00% | 1 | 1 | **0.45** | **LOW** |
| By 2030 | The proportion of electricity used in building energy consumption is expected to exceed 65%. | Building | Implementation plan for carbon peaking in urban and rural construction | Ministries | According to the 2023 Chinese government evaluation report, the share of electricity consumption in building energy consumption was 48.1% (30% in 2020). | 51.43% | 1 | 1 | **0.46** | **LOW** |
| By 2060 | Improve the proportion of non-fossil fuels in energy consumption to over 80%. | Overall | China’s Mid-Century Long-Term Low Greenhouse Gas Emission Development Strategy Working Guidance for Carbon Dioxide Peaking and Carbon Neutrality in Full and Faithful Implementation of the New Development Philosophy | CCP &State Council | By 2023, the share of non-fossil fuels in primary energy consumption had increased to 17.5%, according to the mid-term evaluation report of the National Development and Reform Commission (15.9% in 2020). | 2.49% | 3 | 1 | **0.41** | **LOW** |

## SI Section 2: Morphological analysis of China’s energy transformation

SI Table 3. Morphological table of scenario development

| **Economy development** | **Low Growth: Prolonged Stagnation Due to Internal and External Pressures**  China’s economic growth is constrained by both external and internal challenges. Declining global demand, rising tariffs, high debt levels, restricted investment, and weak domestic consumption collectively hinder economic expansion. Macroeconomic policies fail to effectively mitigate these pressures, resulting in prolonged economic stagnation.  **GW** | **Moderate Growth: Industrial Support Amid Structural Challenges**  China’s role as the "world factory" and the ongoing urbanization continue to support the development of traditional energy-intensive industries, contributing to economic growth. However, the investment-driven growth model is becoming increasingly unsustainable. High debt levels and an overly competitive labour market erode consumer confidence and suppress domestic spending, limiting future growth potential.  **CS** | **High Growth Driven by Real Estate Recovery and New Urbanisation**  To mitigate the crisis in the real estate market, the government lifts previous restrictions on the property sector, encouraging developers to complete ongoing projects. Real estate recovery and new urbanisation make energy and resource-intensive industries, remain a critical pillar of the economy, driving robust economic growth.  RS | **High Growth Driven by Green and High-Tech Manufacturing**  Economic reforms have strengthened the domestic market by increasing the share of household income in GDP, thereby stimulating consumer spending. Expanding domestic and international consumption drives the growth of green manufacturing, high-tech industries, and the service sector, which collectively replace real estate as the new pillars of sustainable economic development.  **GL** |
| --- | --- | --- | --- | --- |
| **Demographic changes** | **Alleviated decline: Social reforms and Economic Prosperity Drive Family Formation**  The complete abolition of population control policies, coupled with the implementation of hukou system reforms, could significantly enhance societal willingness to have children. Economic prosperity further boosts the confidence of younger generations in family formation.  **RS** | **Moderate decline: Rising Costs and Social Shifts Suppress Fertility**  With continued economic growth and rising per capita income, the costs of housing, education, healthcare, and childcare have significantly increased, making child-rearing more expensive. Furthermore, greater gender equality and women’s empowerment have led to increased workforce participation, reducing societal pressure to have larger families.  **CS GL** | **Accelerated decline: Economic Instability Undermines fertility intension**  Economic downturns lead to a deteriorating employment environment, undermining the confidence of younger generations. Additionally, concerns about healthcare, elderly care, education, and food safety make young people more cautious in decisions related to marriage and childbearing.  **GW** |  |
| **National Climate Policy** | **Limited Progress Beyond Current Achievements**  China struggles to advance beyond its existing decarbonization accomplishments. While significant progress has been made in renewable energy and electric vehicle deployment, economic downturns and technological constraints in industrial decarbonization hinder further policy implementation. This results in significant uncertainty regarding the achievement of both NDC targets and the 2060 net-zero goal.  **GW** | **NDC Achievable, Net-Zero by 2060 Uncertain**  Building on progress in renewables and electric vehicles, rising household consumption drives electrification across end use sectors, enabling the effective achievement of electricity-related policy goals. However, the economy’s reliance on manufacturing and energy-intensive industries weakens the implementation of industrial emission reduction policies. While achieving the NDC target is feasible, meeting the net-zero target by 2060 remains highly uncertain.  **RS** | **Policy Continuity Secures Climate Targets**  All existing climate policies are fully implemented, and sectoral goals are consistently met. China effectively enforces climate policies across sectors through the 2030s and maintains sustained decarbonization efforts beyond 2030. As a result, China successfully reaches its carbon peak by 2030 and achieves carbon neutrality by 2060 as planned.  **CS** | **Ambitious Policies Drive Early Success**  China emerges as a global leader in climate change mitigation, achieving its NDC and net-zero targets ahead of schedule through the implementation of more ambitious and comprehensive policies.  **GL** |
| **Clean technology deployment** | **Limited Innovation and Advancement: Slow Economic Growth Hinders Technological Progress**  Economic slowdown limits investment in research and development, resulting in slow innovation and technological advancement. Cost reductions in low-carbon technologies, such as EVs, wind and solar power, progress slowly.  **GW** | **Moderate Advancements: Gradual but Steady Technological Progress**  Incremental advancements in low-carbon technologies are driven by economic growth or supported by government climate priorities. While the costs of renewable energy technologies, such as wind, solar, and energy storage, continue to decline steadily. the development and deployment of CCS, BECCS, and DAC technologies face persistent scalability challenges, pushing full commercialization beyond 2040.  **CS** | **Breakthrough Innovation: Economic Growth Accelerates Technological Leadership**  Strong economic growth drives significant investment in the research, development, and deployment of low-carbon technologies. Costs of renewable technologies—including wind, solar, and energy storage—decline rapidly.  **RS, GL** |  |
| **CCS deployment** | **Low-End Official Estimates Reflect Limited Government Climate Ambition**  The deployment of Carbon Capture and Storage (CCS), including Bioenergy with CCS (BECCS) and Direct Air Capture (DAC), is significantly delayed in this scenario. Limited policy support and lower climate ambition hinder large-scale investment and adoption, resulting in slow technology development and deployment through mid-century.  **GW** | **Medium Official Estimates Reflect Mixed Drivers of Technological Development**  The development and deployment of CCS, BECCS, and DAC technologies advance gradually due to a combination of economic stimulus or government-led innovation efforts. However, persistent challenges in cost, infrastructure, and scalability delay widespread commercialisation until after 2040.  **RS, CS** | **High-End Official Estimates Reflect Strong Government Ambition:**  CCS achieves full commercialisation by the 2030s, BECCS scales up significantly by 2040, and DAC sees widespread deployment by 2050—enabling large-scale carbon removal and contributing substantially to national emissions reductions.  **GL** |  |

## SI Section 3: China energy transformation scenarios

### Green Lights Scenario

Green Lights(GL) portrays a future of high economic growth and green development in China, mean “go, advance and carry on”22. China emerges as a global model for sustainable development and climate leadership by 2060. Through a strategic blend of economic reform, technological innovation, ambitious climate policies, and active public participation, China successfully meets and surpasses its climate targets. The Green Lights scenario demonstrates that climate actions could be well taken into an economic opportunity23, highlighting China’s path to a greener, more resilient future where innovation, policy, and societal commitment converge.

In the Green Lights scenario, China embarks on a transformative path toward sustainable and inclusive economic growth following its **Dual Circulation Development Paradigm**24and**Beautiful China Initiative (BCI)**25. Central to dual circulation, China will “take the domestic circulation as the mainstay”, expend domestic expending and reduce reliance on investment-led growth26. This rebalanced economic model fosters industrial diversification, with green and high-tech manufacturing and service sector becoming the core drivers of growth.

As one of the main requirements for achieving a Beautiful China, China is ‘actively and steadily promoting carbon peak and carbon neutrality’27. Building on its **1+N Climate Policy System**, the government enacts even more ambitious and comprehensive climate policies that go beyond its **Nationally Determined Contributions (NDCs)** and enable the country to achieve net-zero emissions by 2050—ten years ahead of schedule.

This policy’s success is underpinned by rapid advancements in low-carbon technologies. Driven by **Made in China 2025**28, the costs of clean energy technologies—including electric vehicles, wind turbines, solar PVs—decline rapidly29. The strategic target of cultivating **New Quality Productive Forces (NQPFs)** will drive large-scale investments in research, development, and deployment of innovative technologies30. Technological breakthroughs and commercial operations of key carbon removal technologies are further supported by government programs such as “973 program” and “863 program”31 . Significant advancements in carbon removal technologies are achieved: China's CCS emissions reduction (including BECCS and DAC) reaches 408 million tons by 2030, 1.45 billion tons by 2050, and 1.82 billion tons by 206032. Direct Air Carbon Capture is expected to begin industrial demonstration and promotion by 2035.

Strong government policies and technological breakthroughs drive significant shifts in public environmental behaviour. Sustainable lifestyles become mainstream, driven by demand-side energy reductions, community-led environmental actions, and the adoption of decentralized low-carbon technologies. Programs such as trade-in schemes33 and local government consumption vouchers34 further accelerate the widespread adoption of green home appliances, enhancing energy efficiency and reducing household emissions.

As the share of household spending in GDP increases, it reflects rising incomes and improved living standards, which give young people greater confidence in their future. However, the accompanying rise in living costs—encompassing housing, education, healthcare, and childcare—discourages family formation. Consequently, fertility rates continue to decline moderately, following current trends.

### Red Sun Scenario

In traditional Chinese culture, the colour red symbolizes celebration and prosperity. The image of a rising red sun evokes a sense of improving living standards and growing happiness among the people. The Red Sun (RS) scenario envisions a vibrant and thriving Chinese economy, with a primary focus on economic development, while achieving climate commitments is not the government's top priority. By 2060, China remains a global economic leader, but its environmental progress is fragmented. While the country successfully meets its NDC goals by 2030, the reliance on heavy industries and an investment-driven society hampers progress toward the 2060 net-zero goal. Technological advancements contribute modestly to emissions reductions, but the lack of transformative policy measures and limited public engagement in sustainability prevent comprehensive climate action. The Red Sun scenario underscores the risks of prioritizing short-term economic growth over long-term environmental sustainability, leaving China vulnerable to future environmental challenges and economic instability.

In the Red Sun scenario, China prioritizes economic growth by **real estate market recovery**35 and **people-centred new urbanization strategy**36 To reverse the downturn of the property market, the government lifts previous restrictions and rolls out a bundle of pro-housing policies since 2024, unveils new measures to stabilize housing market encouraging developers to resume and complete stalled projects37. Urban agglomerations is consistently emphasized as key drivers of economic growth from China’s 11th Five-year Plans38,39. As a developing country, China’s urbanization rate reached 66.16% by the end of 2023, leaving considerable room for growth compared to developed nations such as the United States and the United Kingdom, where urbanization levels are around 85%40. The people-centred new urbanization strategy proposed in the **14th Five-Year Plan** further emphasizes “promoting the urbanization of the agricultural transfer population as the primary task of new urbanization”41,which will stimulate substantial investment in municipal and rural infrastructure, public services, and housing, creating substantial new investment opportunities with the potential to drive GDP growth.

Although the new urbanization strategy also mentioned “strengthening ecological restoration and environmental protection” 41, this growth-first approach drives increased industrial production and infrastructure expansion, leaving the government with limited resources to allocate toward industrial decarbonization and technological innovation. The costs of clean energy technologies, such as electric vehicles, wind, and solar, continue to decline steadily, enabling China to meet its NDC target by 2030. However, the development and deployment of carbon removal technologies—Carbon Capture and Storage (CCS), Bioenergy with Carbon Capture and Storage (BECCS), and Direct Air Capture (DAC)—face persistent scalability and commercialization challenges. Without more aggressive policy incentives, achieving the net-zero target by 2060 remains highly uncertain.

Demographic trends in the Red Sun scenario are influenced by a series of government-led social reforms. The continuous decline in fertility rates has been alleviated since the implementation of the three-child policy in 202142. Reforms to the *hukou* (household registration) system, including improved guarantees for migrant children and relaxed settlement restrictions in cities43, significantly reduce childbearing and education costs, enhancing societal fertility intension. Additionally, economic prosperity boosts younger generations' confidence in family formation, further delaying population shrinking.

Consumer behaviour in this scenario is shaped by rising incomes and an increasing preference for comfort and convenience. Higher disposable income drives increased spending on commercial and entertainment activities, resulting in continuous growth in energy service demand (e.g., tourism)44. While green technologies such as electric vehicles and energy-efficient appliances see widespread adoption, this shift is largely motivated by affordability and government incentives (e.g., trade-in schemes33 and local government consumption vouchers34) rather than genuine environmental consciousness. Environmental awareness remains low, with sustainability taking a backseat to personal comfort and consumption.

### Calm Sea Scenario

The Calm Sea (CS) scenario offers a middle-of-road benchmark for the future, both in terms of socio-economic development and climate ambitions, like a 'sea level.' It explores the potential transition of the Chinese energy system, assuming full implementation of current climate policies and successful achievement of climate targets, amidst moderate economic and population changes. By 2060, China achieves its core climate objectives, including peaking emissions by 2030 and reaching carbon neutrality by 2060, in alignment with its international commitments. However, the trade-off between economic growth and emissions reduction results in progress being made through steady, incremental advancements rather than transformative change.

In Calm Sea Scenario, China is pursuing a path toward long-term sustainable economic development, aiming to balance economic growth with its climate commitments. The emerging "new three" industries45—solar power, electric vehicles (EVs), and batteries—have become not only key drivers of China's economy but also significant contributors to its decarbonization objectives46. However, the rapid expansion of clean energy investments introduces the risk of overcapacity, exacerbating structural challenges inherent in China’s investment-driven economic model. To address weak domestic and international demand and the lingering effects of the real estate bubble, the Chinese government has implemented a Dual Circulation Strategy aimed at stimulating domestic consumption and fostering international cooperation. This approach seeks to create new avenues for investment demand, mitigate economic slowdowns, and support sustained moderate growth.

A relatively optimistic economic outlook provides the government with greater flexibility to uphold its climate commitments. However, policy measures lack the boldness necessary to drive more accelerated transitions. China demonstrates policy stability by fully implementing existing climate policies and consistently meeting sectoral targets, enabling the country to peak carbon emissions by 2030 and remain on track to achieve carbon neutrality by 2060.

Achieving dual carbon targets requires additional technological support, encompassing both low-carbon technologies and carbon removal solutions. The costs of clean energy technologies such as electric vehicles (EVs), wind, solar, and energy storage continue to decline steadily, accelerating the adoption of green technologies in household. Public behaviours in this scenario reflects passive adaptation to policy-driven changes rather than proactive engagement in sustainability47. According to estimates from the Ministry of Ecology and Environment**, CCS emissions reduction** (including BECCS and DAC) is expected to reach at least **20 million tons by 2030, 600 million tons by 2050**, and **1 billion tons by 2060. DAC** is projected to begin industrial demonstration and promotion by **2040**32**.**

### Great Wall Scenario

Historically, the Great Wall symbolized China's military defence during times of danger. In the Great Wall (GW) scenario, it represents the barriers and challenges that hinder significant and rapid transformations in China’s economy and energy system. In this context, China faces compounded economic, demographic, and environmental challenges. The stagnating economy, declining population, and stalled climate progress leave the country struggling to sustain growth and meet its international climate commitments. The Great Wall presents a conservative, constrained future where economic hardship and limited policy execution hinder China’s ability to transition to a sustainable and resilient economy.

In the Great Wall scenario, China faces prolonged economic stagnation due to property market crisis48 and sluggish consumer spending49. After decades of investing in infrastructure and real estate at breakneck speed, China has likely reached the point of sharply diminishing returns50. The existing export- and investment-led growth model is losing momentum, while transitioning to a consumption-led growth model proves challenging due to high debt levels among local governments (over 90% of GDP) and households (over 60% of GDP) 51,52.

The economic downturn significantly affects social norms surrounding fertility intentions and sustainable lifestyles. A weakening job market, combined with rising concerns over healthcare, elderly care, education, and food safety, undermines the confidence and trust of younger generations in pursuing marriage and family formation53. Pro-natalist policies fail to reverse the declining fertility rate, contributing to long-term labour market strain and reduced consumer spending. The focus for the majority shifts toward achieving a stable and secure standard of living, with limited attention given to energy conservation or sustainability.

Technological innovation slows markedly due to reduced funding for research and development. Cost reductions in low-carbon technologies, such as electric vehicles, wind, and solar power, stagnate. The deployment and commercialization of critical carbon removal technologies—CCS, BECCS, and DAC—are significantly delayed, preventing large-scale implementation.

China’s progress in decarbonization stalls, falling “off track on all its core 2025 climate targets”54,55 and remaining constrained to earlier achievements in renewable energy deployment and electric vehicle adoption. Industrial decarbonization efforts falter due to financial constraints, which limit large-scale investments in clean energy infrastructure and emissions reduction technologies. Overall, economic stagnation and technological limitations hinder further policy advancements, casting significant doubt on the country’s ability to meet its NDC target by 2030 and its net-zero goal by 2060.

## SI Section 4: Scenario quantification and key assumptions

This supplementary information outlines the core assumptions underpinning our analysis. We develop a set of evidence-based model inputs to operationalize the above scenarios within the TIAM-UCL integrated assessment model. Below, we present the key quantified metrics used to translate the scenario narratives into model inputs:
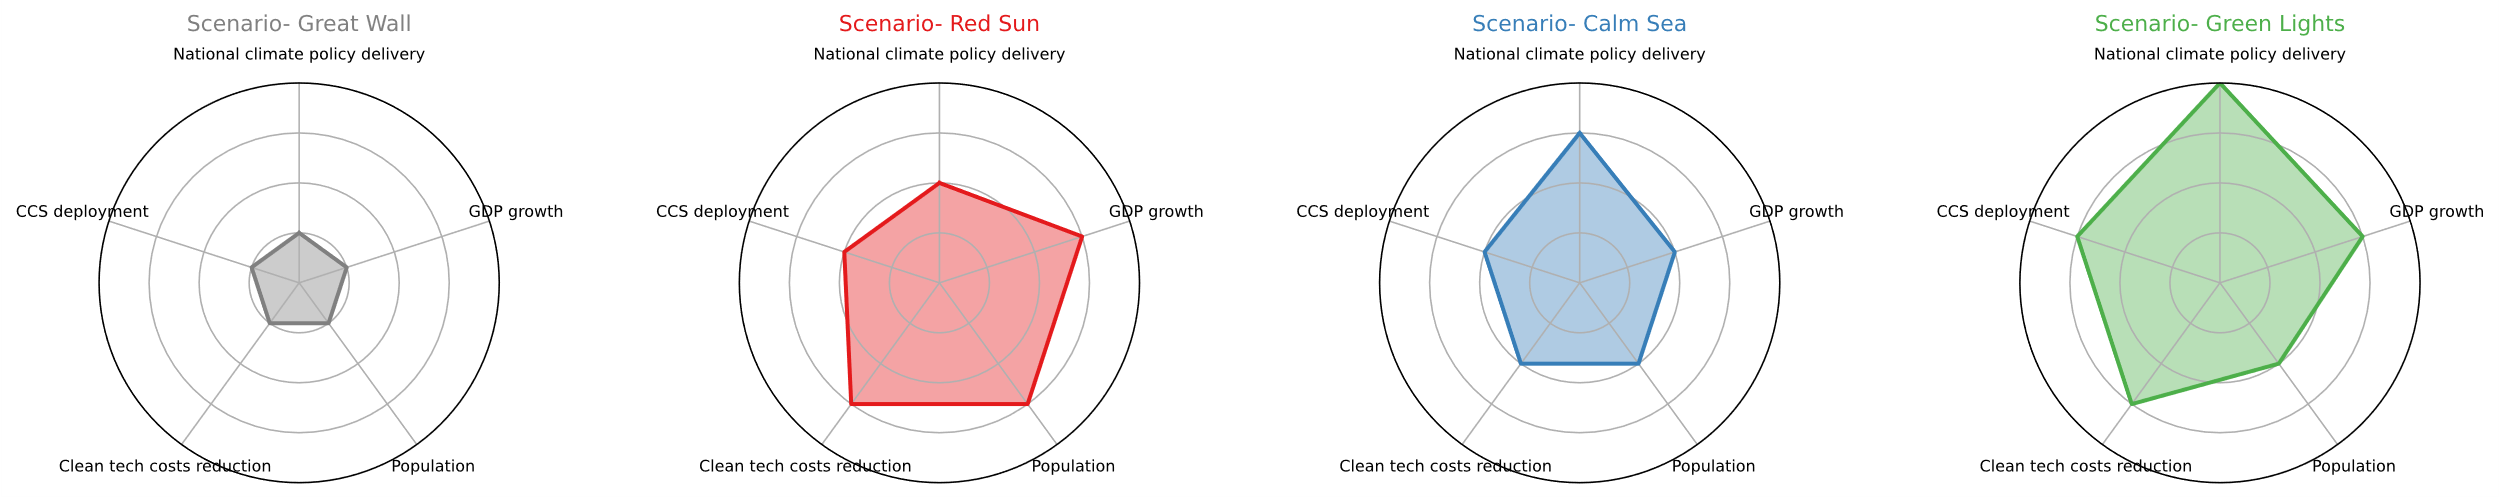


SI Figure 3: key scenario quantification matrix

### National Climate policy delivery

Based on national climate action narratives, we use the degree of policy delivery as a quantitative indicator across scenarios (see SI Figure X). This is determined by the assessed credibility level of each target—classified as ‘achieved’, ‘high’, ‘medium’, or ‘low’. Targets with higher credibility ratings are more likely to be implemented in practice. Accordingly, the Great Wall scenario, which enforces only ‘achieved’ targets, represents the most conservative pathway, reflecting minimal delivery. Across scenarios, targets are progressively implemented from high to low credibility. From Great Wall to Green Lights, the strength of policy implementation increases, with an expanding set of targets assumed to be met—culminating in the full realisation of China’s overarching climate commitment: carbon neutrality by 2060 or before 2060 (assumed as 2050).

**SI Table 4. Quantification of National Climate Actions in TIAM-UCL**

| **Scenario** | **Great Wall** | **Red Sun** | **Calm Sea** | **Green Lights** |
| --- | --- | --- | --- | --- |
| **Narratives around national climate actions** | **Limited Progress Beyond Current Achievements**  China struggles to advance beyond its existing decarbonization accomplishments. While significant progress has been made in renewable energy and electric vehicle deployment, economic downturns and technological constraints in industrial decarbonization hinder further policy implementation. This results in significant uncertainty regarding the achievement of both NDC targets and the 2060 net-zero goal.  **GW** | **NDC Achievable, Net-Zero by 2060 Uncertain**  Building on progress in renewables and electric vehicles, rising household consumption drives electrification across end use sectors, enabling the effective achievement of electricity-related policy goals. However, the economy’s reliance on manufacturing and energy-intensive industries weakens the implementation of industrial emission reduction policies. While achieving the NDC target is feasible, meeting the net-zero target by 2060 remains highly uncertain.  **RS** | **Policy Continuity Secures Climate Targets**  All existing climate policies are fully implemented, and sectoral goals are consistently met. China effectively enforces climate policies across sectors through the 2030s and maintains sustained decarbonization efforts beyond 2030. As a result, China successfully reaches its carbon peak by 2030 and achieves carbon neutrality by 2060 as planned.  **CS** | **Ambitious Policies Drive Early Success**  China emerges as a global leader in climate change mitigation, achieving its NDC and net-zero targets ahead of schedule through the implementation of more ambitious and comprehensive policies.  **GL** |
| **Degree of Climate policy delivery** | **Achieved targets** | **Targets ranging from those already achieved to those with high credibility** | **Targets ranging from those already achieved to those with medium credibility** | **Targets ranging from those already achieved to those with low credibility ~~More ambitious policy might be issued to overachieve dual carbon targets~~** |
| Targets achieved | **By 2025, annual crude oil production will stabilize at around 200 million tons.**  **By 2025, annual natural gas production will exceed 230 billion cubic meters.**  **By 2025, 100,000 to 200,000 tons of hydrogen will be produced from renewable energy annually.**  **By 2025, 33% of electricity will be generated from renewables.**  **By 2025, approximately 40 gigawatts of additional hydropower capacity will be installed from 2020 (360 GW).**  **By 2025, the proportion of EAF in iron and steel production will increase to 15%.**  **By 2025, the average fuel consumption of new passenger cars will be reduced to 4.0 liters/100 km.**  **By 2025, new energy buses are expected to account for 72% of all surface public transport vehicles in urban areas.**  **By 2025, sales of new energy vehicles will account for about 20% of total new car sales.**  **By 2030, the total installed capacity of wind and solar power will increase to over 1.2 billion kilowatts.**  **By 2030, the average fuel consumption of new passenger cars will be reduced to 3.2 liters/100 km.** | | | |
| **Policy with high credibility implemented** | | By 2025, total renewable energy consumption will reach about 1 billion tons of standard coal (~29,300 PJ).  By 2025, total renewable energy consumption will account for about 18% of primary energy consumption.  By 2025, total installed power generation capacity will reach approximately 3,000 gigawatts (GW).  By 2025, 18% of electricity will come from non-hydropower renewables.  By 2025, domestic capacity for primary refining of crude oil will be kept below 1 billion metric tons (20 million b/d), and the utilization rate of production capacity for main products will rise to 80% or more.  By 2030, CO₂ emissions per unit of GDP will be reduced by over 65% from the 2005 level.  By 2030, approximately 40 gigawatts of additional hydropower capacity will be installed from 2020 (360 GW).  By 2030, the share of incremental vehicles fueled by new and clean energy will reach around 40%.  By 2030, 100% of public vehicles will be electrified. | | |
| **Policy with high credibility implemented** | | | By 2025, energy consumption per unit of GDP will be lowered by 13.5% from the 2020 level.  By 2025, carbon dioxide (CO₂) emissions per unit of GDP will be lowered by 18% from the 2020 level.  By 2025, the share of non-fossil energy consumption will have reached around 20%.  By 2025, renewable energy will account for more than 50% of the incremental primary energy consumption.  By 2025, the non-electric utilization of renewable energy (including geothermal heating, biomass heating, biomass fuels, and solar thermal utilization) will reach over 60 million tons of standard coal (~1,758 PJ).  By 2025, power generation from renewable energy will reach approximately 3,300 TWh.  By 2025, the amount of recycled steel will reach 320 million tons, updated to 300 million tons in the newest policy of 2024.  By 2025, carbon intensity of transportation will be reduced by 5% compared to 2020.  By 2025, the average electricity consumption of new passenger BEVs will be ≥12.0 kWh/100 km.  By 2025, the share of electricity consumption in building energy consumption will exceed 55%.  By 2025, renewable energy use in urban buildings will reach 8%.  By 2030, China will strive to reach a peak in petroleum consumption for land transportation.  By 2030, China will timely achieve its carbon peak.  By 2060, China will timely achieve carbon neutrality (net zero). | |
| **Policy with low credibility implemented** | | | | **By 2025, electricity is expected to account for about 30% of end-use energy consumption.**  **By 2025, the proportion of non-fossil energy in power generation will reach about 39%.**  **By 2025, the operational installed capacity of nuclear power will reach approximately 70 GW.**  **By 2025, CO₂ emissions per unit of industrial added value will be reduced by 18%.**  **By 2025, comprehensive energy consumption per ton of steel will be reduced by over 2% compared to 2020 (in 2024, it has been updated to decrease energy intensity by 2% compared to 2023).**  **By 2025, the energy consumption per unit of industrial added value in large-scale industries is expected to decrease by 13.5% compared to 2020.**  **By 2025, electricity is expected to account for approximately 30% of industrial end-use energy consumption.**  **Before 2030, China will achieve its carbon peak (assumed to be 2025).**  **By 2030, the share of non-fossil fuels in primary energy consumption will increase to around 25%.**  **By 2030, the proportion of EAF in iron and steel production will be increased to over 20%.**  **By 2030, the proportion of electricity used in building energy consumption is expected to exceed 65%.**  **Before 2060, China will achieve carbon net zero (assumed to be 2050).**  **By 2060, the proportion of non-fossil fuels in energy consumption will increase to over 80%.** |

### Economic growth

China’s economic development has exhibited different characteristics across stages, shaped by structural shifts from a labour-intensive economy to one increasingly driven by industry and services, each with varying impacts on energy demand56,57. Since the beginning of economic reforms in 1978, China experienced rapid growth, averaging nearly 10% annually between 2000 to 2013 58. In the years following, China entered a “new normal,” transitioning from a growth model focused on speed and scale to one prioritising quality and efficiency 59. From 2013 to 2019, GDP growth moderated to around 6–7%, constrained by factors such as a shrinking labour force, diminishing returns on investment, and slowing productivity gains. In 2021, the economy was significantly affected by COVID-19 lockdowns and the "zero-COVID" policy, resulting in a sharp downturn. Following the relaxation of pandemic restrictions in 2022, economic activity began to rebound. In 2024, China’s GDP grew by 5%, narrowly meeting the government’s official target.

Although there are signs of recovery in China's economy following the pandemic, since 2023, challenges such as the real estate slump and decreased demand for exports have impeded its growth to pre-pandemic rates. Major international banks, including Goldman Sachs, UBS, JPMorgan, Morgan Stanley, and CITI, projected China's annual GDP growth rate of 2024 to be between 4.2% and 4.9% 60. The International Monetary Fund (IMF) forecasts similar growth rates of 4.6% for 2024 and 4.1% for 2025 51. By 2028, the growth is expected to decelerate to approximately 3.5%, influenced by challenges such as declining productivity, an aging population, diminishing investment returns, and geoeconomic fragmentation 61. The Japan Centre for Economic Research (JCER) predicts that China's growth rate will fall below 3% post-2029, potentially declining further if the real estate bubble bursts 62. Economy scenarios study from Carnegie 63 which analysed China’s debt burden, economy driven model (consumption, investment), shows that if China rebalances its economy structure from investment to consumption, the long term (15-20 years) GDP growth rate is limited to 2-3 % due to disruption caused by structural transition.

In addition to commercial projections, many international research institutions produce global GDP forecasts using macroeconomic models that align with various future development narratives. The most widely used framework is the Shared Socioeconomic Pathways (SSPs)64, which outlines five global scenarios along axes of adaptation and mitigation. These narratives are quantified by research teams to provide projections for GDP, population, and urbanisation. For GDP, three interpretations have been developed by OECD, IIASA, and PIK65. Though all follow the SSP storylines, they differ in methodology and assumptions, leading to varying outcomes. However, the SSP framework tends to generalise global development, assuming different degree convergence of income by 2100, often overlooking the country level uncertainties. For example, IIASA’s GDP projections show a stagnation trend for China from 2020 to 2040, while OECD’s ENV-Growth model suggests ~5% annual growth from 2025 to 2030, then a gradual decline. Given this divergence and the need for a robust understanding of uncertainties in China’s economic development, our study derives three GDP growth trajectories—high, medium, and low—based on a wide range of sources. These include 267 China national scenarios from IPCC AR6, updated SSP1–5 projections from IIASA and OECD, short-term forecasts from the IMF and major investment banks, as well as scenario inputs from BP, IEEJ, Equinor, Shell, and the IEA (see SI Figure 4). We select the 25th, 50th (median), and 75th percentiles of the GDP projection distribution to represent the low, medium, and high growth trajectories, respectively. These correspond to the China’s GDP pathways of the Great Wall (Low), Calm Sea (Medium), Red Sun (High), and Green Lights (High) scenarios.


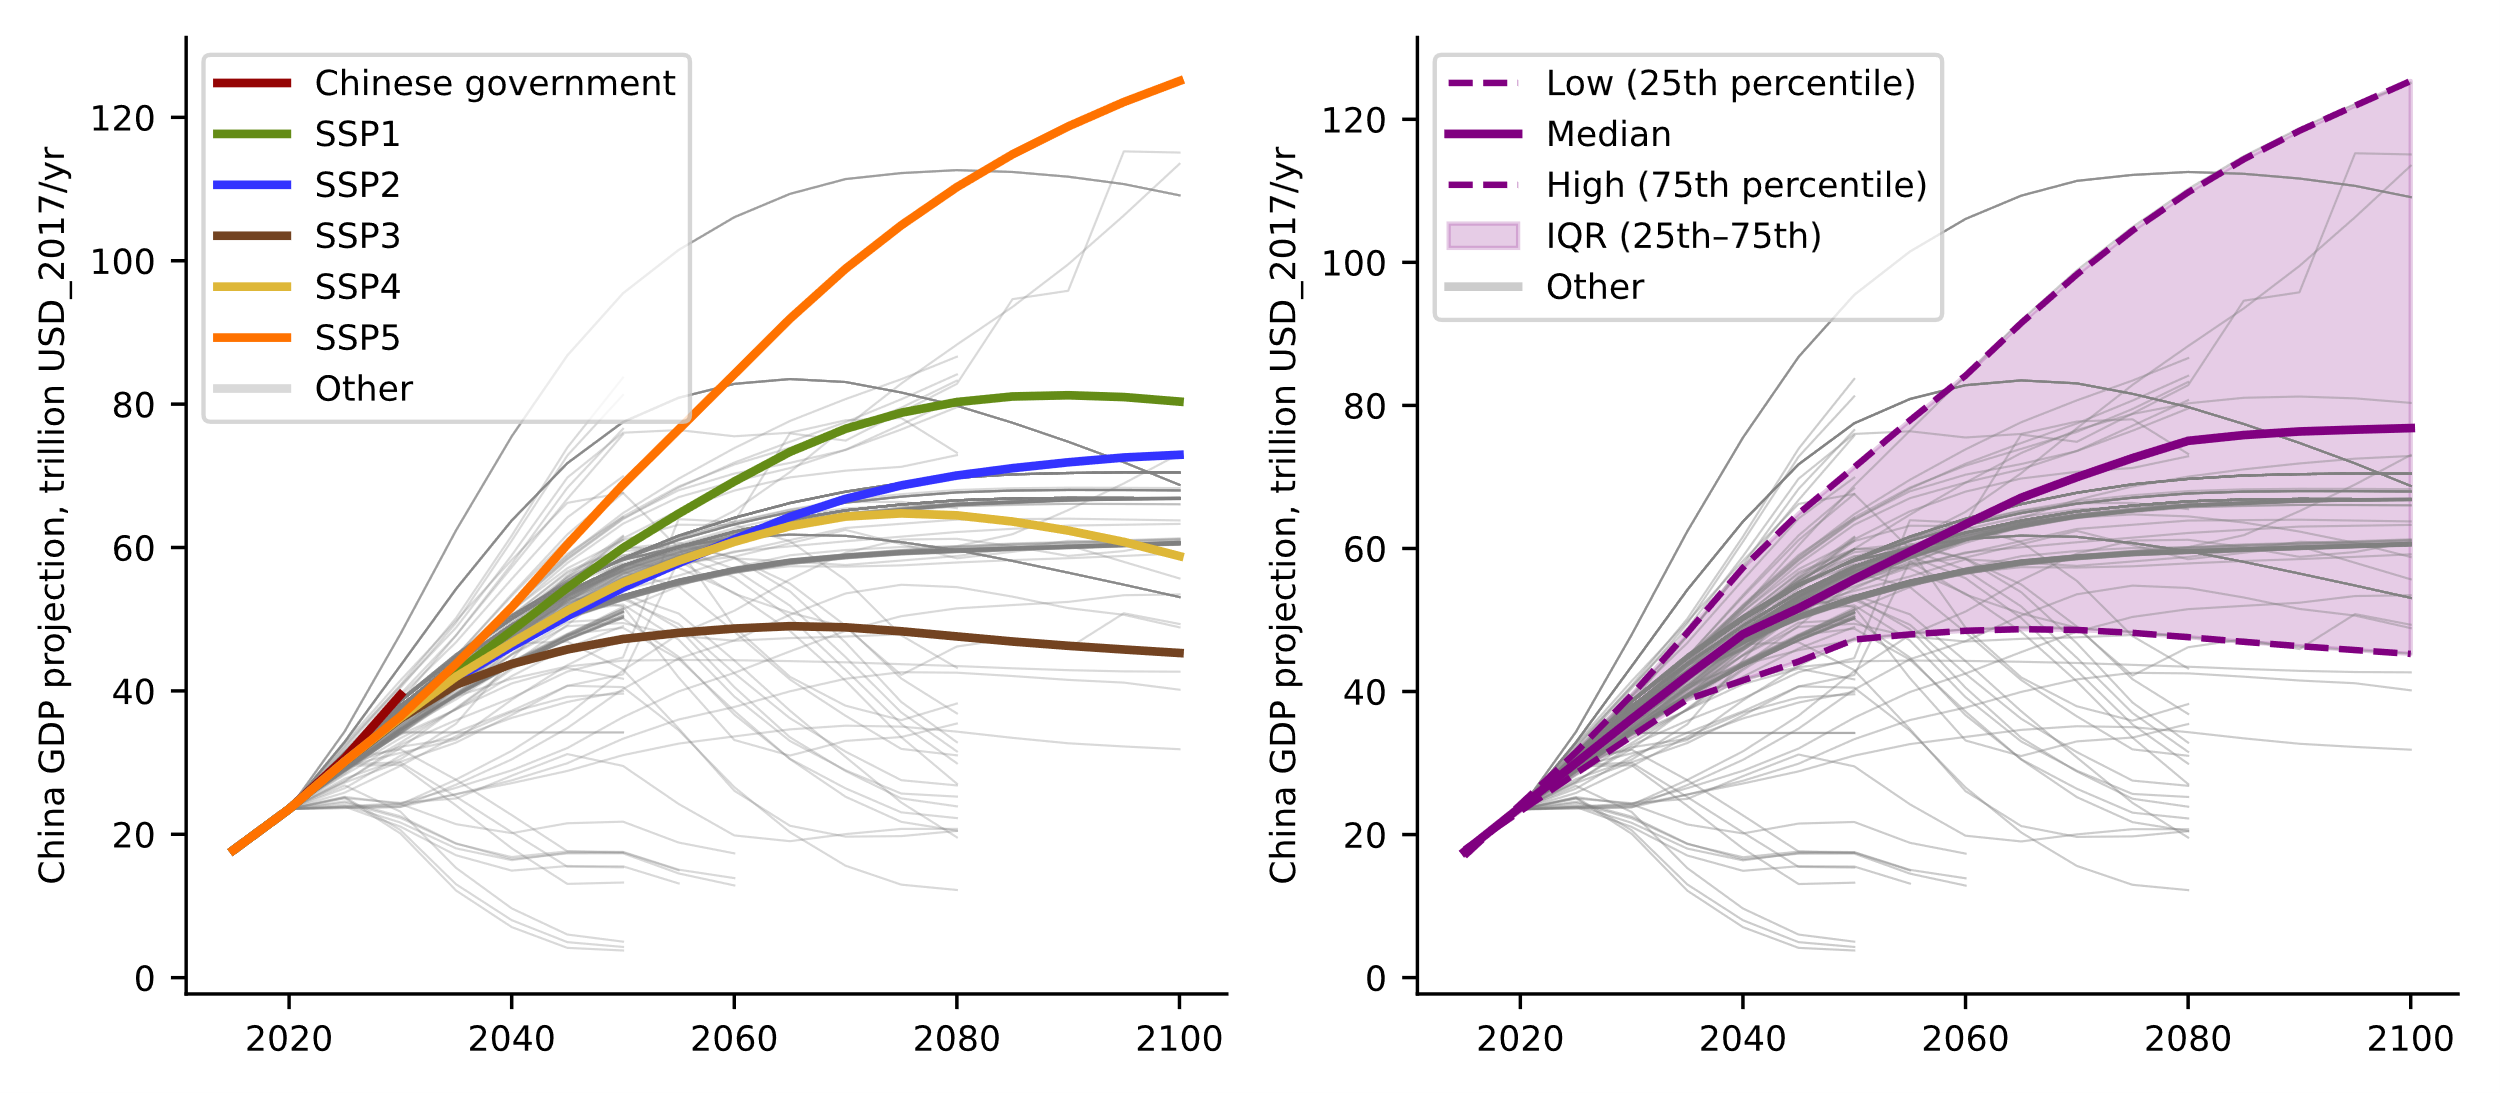


SI Figure 4China GDP projections uncertainty, other includes: 267 China national scenarios from IPCC AR6, short-term forecasts from the IMF and major investment banks, as well as scenario inputs from BP, IEEJ, Equinor, Shell, and the IEA. (The low, median, and high trajectories shown have been smoothed to reflect consistent long-term trends)

### Population changes

China has had the world’s largest population since at least 1950. Most projections have predicted that its population would peak between 2030 and 2035 at around 1.4–1.5 billion before entering a gradual decline. However, data from China’s National Bureau of Statistics revealed that in 202266, the population declined to 1.41 billion, marking the first year-on-year drop in six decades. This unexpected shift has prompted widespread debate among scholars and policymakers over the accuracy of earlier projections and the broader implications for China’s economic growth, labor force, and social welfare systems.

For future population projections, numerous studies have examined China’s demographic outlook, with most drawing on datasets from key institutions such as the World Bank, the United Nations (UN), and the International Institute for Applied Systems Analysis (IIASA). The World Bank provides national estimates under varying economic scenarios up to 2050, which is insufficient for the long-term horizon required by our TIAM modelling. The UN publishes global forecasts based on demographic modelling techniques, while IIASA offers long-term projections (2010–2100) as part of the Shared Socioeconomic Pathways (SSPs) framework.

In this study, we adopt the UN’s 2022 population projections for three main reasons. First, although SSP projections are widely used, they do not fully capture recent demographic developments in China—such as the earlier-than-expected population peak. Moreover, updated SSP projections are harmonised with the World Bank’s short-term estimates (2020–2026) and apply SSP-specific growth rates thereafter67. These growth rates embed socioeconomic assumptions that may not align with the narratives used in our scenarios. Second, the UN’s forecasts rely on standard demographic modelling techniques and are less influenced by assumptions about economic or governance trajectories, making them more independent our framework. Third, our scenario narratives incorporate assumptions about fertility and population dynamics that align closely with the range covered by the UN projections, ensuring consistency across our socioeconomic dimensions (see SI Table 6).

SI Table 5 Key population projection datasets issued from 2019 including China’s projection

| Name | Publish year | Spatial resolution | Temporal resolution | Scenario | Publisher |
| --- | --- | --- | --- | --- | --- |
| IIASA | 2023 | Country | 2010-2100, by 5 | SSP1-SSP5 | Institute for Applied system analysis65 |
| UN | 2022 | Country | 1950-2100, by1 | Estimates  Low fertility  Medium fertility  High fertility  Instant replacement-fertility  Momentum  Constant-mortality  No Change  Zero-migration | United Nations68 |
| BNU | 2022 | Country and Provincial | 2020-2100, by 1 | SSP2 | Beijing Normal University69 |
| THU | 2020 | 30 m | 2010-2100, by1 | SSP1-SSP5 | Tsinghua University68 |
| SEDAC | 2020 | 1km | 2010-2100, by 10 | SSP1-SSP5 | Socio economic data and application centre70 |
| NUIST | 2019 | 0.5 ° | 2010-2100, by 1 | SSP1-SSP5 | Nanjing University of information Science and Technology71 |
| IHME | 2019 | Country | 1950-2100，by 1 | Reference, Slower, Faster, Fastest (female educational attainment) | Institute for Health Metrics and evaluation72 |
| WCDE | 2019 | Country | 1950-2100, by 5 | SSP 1-Rapid development  SSP 2-medium  SSP 3-stalled development  SSP 2-Medium zero migration  SSP 2-Medium double migration | Wittgenstein Centre Data Explorer73 |

**SI Table 6. Quantification of Population Changes in TIAM-UCL**

| **Scenario** | **Scenario narratives regarding population** | **Fertility rate** | **Numerical assumptions of population (million)** | | | |
| --- | --- | --- | --- | --- | --- | --- |
| **2030** | **2050** | **2080** | **2100** |
| **Great Wall** | Accelerated decline: Economic Instability Undermines fertility intension  Economic downturns lead to a deteriorating employment environment, undermining the confidence of younger generations. Additionally, concerns about healthcare, elderly care, education, and food safety make young people more cautious in decisions related to marriage and childbearing. | Low | 1396.24 | 1221.77 | 769.46 | 494.14 |
| **Calm Sea, Green Lights** | Moderate decline: Rising Costs and Social Shifts Suppress Fertility  With continued economic growth and rising per capita income, the costs of housing, education, healthcare, and childcare have significantly increased, making child-rearing more expensive. Furthermore, greater gender equality and women’s empowerment have led to increased workforce participation, reducing societal pressure to have larger families. | Medium | 1416.87 | 1316.95 | 978.55 | 771.30 |
| **Red Sun** | Alleviated decline: Social reforms and Economic Prosperity Drive Family Formation  The complete abolition of population control policies, coupled with the implementation of hukou system reforms, could significantly enhance societal willingness to have children. Economic prosperity further boosts the confidence of younger generations in family formation. | High | 1437.56 | 1413.10 | 1233.97 | 1154.04 |

### Clean technology deployment

Clean technologies in the energy system are widely recognised as a cornerstone for mitigating climate change. In our scenario framework, clean technology development is differentiated both in narrative terms and in model quantification. We focus on two representative technologies: solar photovoltaics (PV) and wind turbines. To project future technology costs, specifically capital costs and fixed operation and maintenance (O&M) costs, we apply an open-source, Python-based tool that enables exogenous cost projections with China-specific detail across scenarios, this tool is developed and firstly applied to MESSAGEix-GLOBIOM74,75.

In this tool, one region can be defined as the “reference region”, a technology leader whose cost trajectory other regions follow. For the reference region, future costs are projected using a “progress rate” based on Moore’s Law, which assumes an exponential decline in costs over time. The progress rate varies by technology and scenario and is applied over the 2025–2100 horizon.

We adopt this approach for two main reasons. First, projecting technology costs across all sectors in an integrated assessment model (IAM) involves numerous assumptions and datasets, making it difficult to ensure consistency and transparency. This tool provides the flexibility to easily adjust technologies, regions, and scenarios. In our case, China is defined as the reference region, and we align the technology cost projections with our scenario-specific GDP assumptions, ensuring consistency between economic development and technological innovation. Second, many IAMs tend to overestimate energy transition costs by underestimating the pace of renewable cost reductions and deployment. This tool incorporates historical data from the IEA’s World Energy Outlook (2023)48 to derive base-year regional cost ratios, better capturing emerging market dynamics and regional variation—both critical for global modelling.

**SI Table 7.** Quantification of Solar PV +Wind CAPEX of China in TIAM-UCL (Unit: 2005 USD/KW)

| **High cost reduction ---Green Lights/Red Sun** | | | | |
| --- | --- | --- | --- | --- |
|  | **2020** | **2030** | **2040** | **2050** |
| **Solar PV-Rooftop** | 550 | 387 | 204 | 122 |
| **Solar PV-Utility Scale** | 495 | 348 | 183 | 109 |
| **Offshore Wind** | 1771 | 1465 | 1074 | 862 |
| **Onshore Wind** | 1181 | 977 | 716 | 575 |
| **Medium cost reduction ---Calm Sea** | | | | |
|  | **2020** | **2030** | **2040** | **2050** |
| **Solar PV-Utility Scale** | 550 | 444 | 311 | 241 |
| **Solar PV-Rooftop** | 495 | 400 | 280 | 217 |
| **Offshore Wind** | 1771 | 1541 | 1235 | 1059 |
| **Onshore Wind** | 1181 | 1028 | 823 | 706 |
| **Low cost reduction ---Great Wall** | | | | |
|  | **2020** | **2030** | **2040** | **2050** |
| **Solar PV-Utility Scale** | 550 | 517 | 468 | 437 |
| **Solar PV-Rooftop** | 495 | 465 | 421 | 393 |
| **Offshore Wind** | 1771 | 1663 | 1506 | 1406 |
| **Onshore Wind** | 1181 | 1109 | 1004 | 938 |

### CCS deployment

The significance of CCS in the global transition to carbon neutrality is consistently highlighted in global integrated assessment models (IAMs), as well as in the IPCC’s Assessment Reports, IEA’s World Energy Outlook and Energy Technology Perspectives. Many studies have confirmed the critical role of carbon capture and storage (CCS) in enabling China to achieve its net-zero targets31,76,77.

As of now, approximately 40 CCUS demonstration and pilot projects are either operational or under construction in China, collectively achieving about 3 million tonnes of CO₂ reductions per year32. Most of these projects remain small-scale, with capture capacities ranging from 10,000 to 100,000 tonnes annually. Only two exceed 500,000 tonnes. The main sectors involved are power generation, chemicals, iron and steel, and cement—with the power and chemical industries alone accounting for over 40% of total capacity.

This study adopts the government’s official estimates from the China CCUS Roadmap Report (2021)32 as the basis for our scenario assumptions, for three key reasons. First, given that most current CCUS projects are still in the demonstration phase and face financial viability challenges due to high capital costs and low or negative internal rates of return (IRR), government and state-owned enterprise involvement will continue to be the primary driver of near-term development. Therefore, projections from official sources are more credible and reflect realistic expectations. Second, since our scenarios are featured with policy granularity, government-derived estimates align more consistently with the narrative framework. Third, the China CCUS Roadmap Report provides a comprehensive, policy-informed estimate range across subsectors, synthesised from over 20 studies, and thus better captures the uncertainties surrounding future CCS deployment. Accordingly, we use the high-end estimates for Green Lights, the low-end for Great Wall, and the mid-range values for Red Sun and Calm Sea (see SI Table 8).

SI Table 8 Quantification of CCS deployment of China in TIAM-UCL ((units: Mt CO2/ year)

| **High estimation ----Green Lights** | | | | | | |
| --- | --- | --- | --- | --- | --- | --- |
|  | **2025** | **2030** | **2035** | **2040** | **2050** | **2060** |
| **Coal-fired plant** | 6 | 20 | 100 | 500 | 500 | 500 |
| **Gas power plant** | 1 | 5 | 100 | 100 | 100 | 100 |
| **Steel and iron** | 1 | 5 | 20 | 30 | 70 | 110 |
| **BECCS** | 0.5 | 1 | 18 | 100 | 500 | 600 |
| **DACCS** | 0 | 0 | 1 | 15 | 100 | 300 |
| **Medium estimation ---Red Sun and Calm Sea** | | | | | | |
|  | **2025** | **2030** | **2035** | **2040** | **2050** | **2060** |
| **Coal-fired plant** | 6 | 20 | 100 | 350 | 350 | 350 |
| **Gas power plant** | 1 | 5 | 60 | 60 | 60 | 60 |
| **Steel and iron** | 1 | 3.5 | 15 | 25 | 60 | 100 |
| **BECCS** | 0.5 | 1 | 18 | 90 | 350 | 450 |
| **DACCS** | 0 | 0 | 1 | 15 | 75 | 250 |
| **Low estimation ----Calm Sea** | | | | | | |
|  | **2025** | **2030** | **2035** | **2040** | **2050** | **2060** |
| **Coal-fired plant** | 6 | 20 | 5 | 200 | 200 | 200 |
| **Gas power plant** | 1 | 5 | 20 | 20 | 20 | 20 |
| **Steel and iron** | 1 | 2-5 | 10 | 20 | 50 | 90 |
| **BECCS** | 0.5 | 1 | 18 | 80 | 200 | 300 |
| **DACCS** | 0 | 0 | 1 | 15 | 50 | 200 |

## SI Section 5: Energy Service Demand in TIAM-UCL

This supplementary information outlines the energy service demand inputs used in TIAM-UCL, based on the scenario assumptions for China described in SI Section 4. TIAM-UCL represents final energy demand across four sectors—residential, commercial, transport, and industry—using a set of exogenously defined end-use energy service demands (ESDs). These demands are specified at the regional level and cover services such as residential space heating, domestic aviation, and iron and steel production (see SI Table 9 for the complete list).

SI Table 9. List of energy service demands

| **Code** | **Service demand** | **Unit** | **Driver** |
| --- | --- | --- | --- |
| ICH | Chemicals | PJ | PICH |
| IIS | Iron and Steel | Mt | PIIS |
| INF | Non-ferrous metals | Mt | PINF |
| INM | Non-Metals Mineral | PJ | PINM |
| ILP | Pulp and Paper | Mt | PILP |
| IOI | Other Industries | PJ | POI |
| NEO | Industrial and Other Non-Energy Uses | PJ | GDP |
| ONO | Other non-specified consumption | PJ | GDP |
| AGR | Agricultural demand | PJ | PAGR |
| CC1 | Commercial Cooling - Region 1 | PJ | PSER |
| CCK | Commercial Cooking | PJ | PSER |
| CH1 | Commercial Space Heat - Region 1 | PJ | PSER |
| CHW | Commercial Hot Water | PJ | PSER |
| CLA | Commercial Lighting | PJ | PSER |
| COE | Commercial Office Equipment | PJ | PSER |
| CRF | Commercial Refrigeration | PJ | PSER |
| RC1 | Residential Cooling - Region 1 | PJ | HOU/GDPPHOU* |
| RCD | Residential Clothes Drying | PJ | HOU/GDPPHOU* |
| RCW | Residential Clothes Washing | PJ | HOU/GDPPHOU* |
| RDW | Residential Dishwashing | PJ | HOU/GDPPHOU* |
| REA | Residential Other Electric | PJ | HOU/GDPPHOU* |
| RH1 | Residential Space Heat - Region 1 | PJ | HOU |
| RHW | Residential Hot Water | PJ | POP |
| RK1 | Residential Cooking - Region 1 | PJ | POP |
| RL1 | Residential Lighting - Region 1 | PJ | GDPP |
| RRF | Residential Refrigeration | PJ | HOU/GDPPHOU* |
| NEU | Non-Energy Uses | PJ | GDP |
| TAD | Domestic Aviation | PJ | GDP |
| TAI | International Aviation | PJ | GDP |
| TRB | Road Bus Demand | Bv-km | POP |
| TRC | Road Commercial Trucks Demand | Bv-km | GDP |
| TRE | Road Three Wheels Demand | Bv-km | POP |
| TRH | Road Heavy Trucks Demand | Bv-km | GDP |
| TRL | Road Light Vehicle Demand | Bv-km | GDP |
| TRM | Road Medium Trucks Demand | Bv-km | GDP |
| TRT | Road Auto Demand | Bv-km | GDPP |
| TRW | Road Two Wheels Demand | Bv-km | POP |
| TTF | Rail-Freight | PJ | GDP |
| TTP | Rail-Passengers | PJ | POP |
| TWD | Domestic Internal Navigation | PJ | GDP |
| TWI | International Navigation | PJ | GDP |
| *Driver is GDPPHOU for AFR, CHI, CSA, EEU, FSU, IND, MEA, MEX, ODA and SKO | | | |

Each service demand is projected from 2005-2100 by relating it to a given demand driver and using the expression:

Here α is a decoupling factor which is used to adjust the strength of the relationship between demand driver and ESD, thereby reflecting shifts in the wider socio-economic system. Drivers are listed in Table 9 and their code explained in Table 10. The ESDs ICH, IIS, INF, INM, ILP and AGR do not use a decoupling factor and are directly linked to their respective drivers.

SI Table 10. List of drivers for projecting energy service demands

| **Driver** | **Description** |
| --- | --- |
| PICH | Production of chemicals |
| PIIS | Production of iron and steel |
| PINF | Production of non-ferrous metals |
| PINM | Production of cement |
| PILP | Production of pulp and paper |
| PIOI | Production of other industries |
| PAGR | Production of agriculture (linked to calories consumed) |
| PSER | Services (directly linked to GDP growth) |
| HOU | Number of households |
| POP | Population |
| GDP | GDP |
| GDPP | GDP per capita |
| GDPPHOU | GDP per capita per household |

In this analysis, China’s key energy service demands—such as heating, cooling, and iron and steel production—are modelled using scenario-specific socio-economic assumptions (see SI Section 4). The evolution of these demands across China’s scenarios is shown in the figure (SI figure 3) below. For the rest of the world, energy service demands follow the SSP2 drivers.


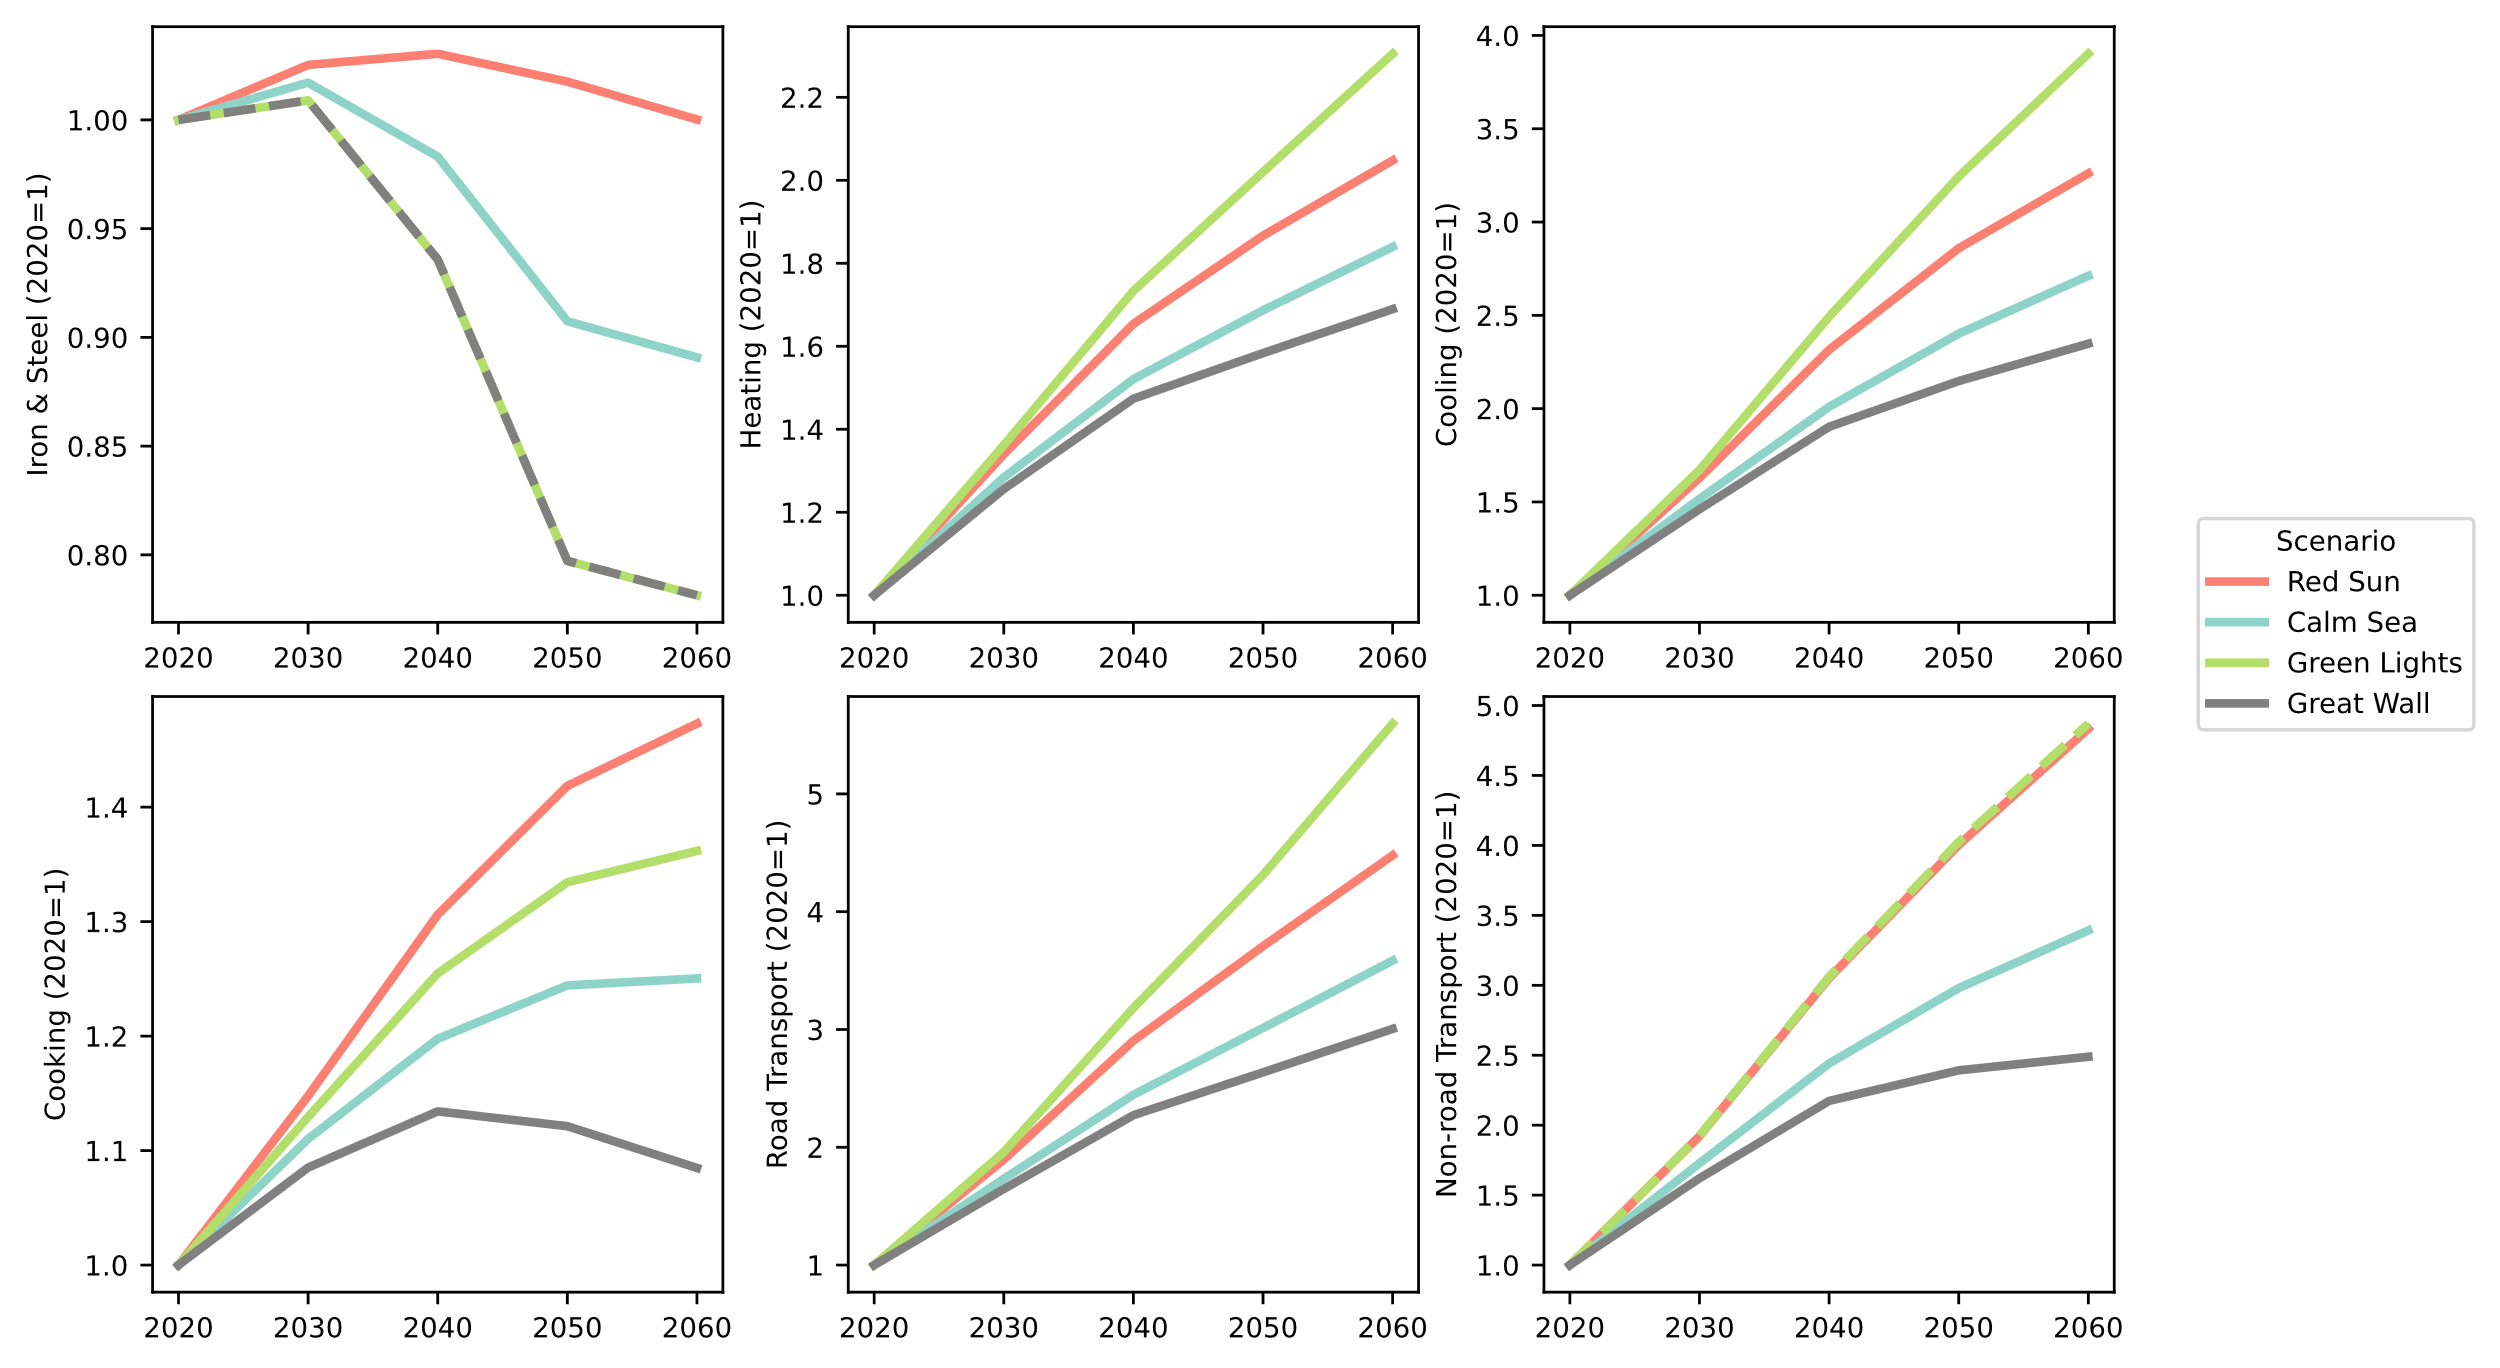


**SI Figure 5.** Projected growth in key energy service demands in China modelled in TIAM-UCL (relative to 2020)

# Reference

1. Markard, J., Raven, R. & Truffer, B. Sustainability transitions: An emerging field of research and its prospects. *Research Policy* **41**, 955–967 (2012).

2. Nemet, G. F., Jakob, M., Steckel, J. C. & Edenhofer, O. Addressing policy credibility problems for low-carbon investment. *Global Environmental Change* **42**, 47–57 (2017).

3. Rogelj, J. *et al.* Credibility gap in net-zero climate targets leaves world at high risk. *Science* **380**, 1014–1016 (2023).

4. Teng, F. Ambitious and credible pledges. *Nat. Clim. Chang.* **12**, 779–780 (2022).

5. Victor, D. G., Lumkowsky, M. & Dannenberg, A. Determining the credibility of commitments in international climate policy. *Nat. Clim. Chang.* **12**, 793–800 (2022).

6. Brunner, S., Flachsland, C. & Marschinski, R. Credible commitment in carbon policy. *Climate Policy* **12**, 255–271 (2012).

7. Jacobs, A. M. Policy Making for the Long Term in Advanced Democracies. *Annual Review of Political Science* **19**, 433–454 (2016).

8. Rogge, K. S. & Reichardt, K. Policy mixes for sustainability transitions: An extended concept and framework for analysis. *Research Policy* **45**, 1620–1635 (2016).

9. Zhu, M. The Rule of Climate Policy: How Do Chinese Judges Contribute to Climate Governance without Climate Law? | Transnational Environmental Law | Cambridge Core. https://www.cambridge.org/core/journals/transnational-environmental-law/article/rule-of-climate-policy-how-do-chinese-judges-contribute-to-climate-governance-without-climate-law/41A922D370E2E373389F521BEE54511F?utm_source=chatgpt.com (2021).

10. Oxford Institute of Enegy Studies. Appendix A: Government Structure. *Guide to Chinese Climate Policy* https://chineseclimatepolicy.oxfordenergy.org/book-content/appendicies/government-structure/ (2021).

11. Xu, S. China’s climate governance for carbon neutrality: regulatory gaps and the ways forward. *Humanit Soc Sci Commun* **10**, 1–10 (2023).

12. Teng, F. & Wang, P. The evolution of climate governance in China: drivers, features, and effectiveness. *Environmental Politics* **30**, 141–161 (2021).

13. Ran, R. Perverse Incentive Structure and Policy Implementation Gap in China’s Local Environmental Politics. *Journal of Environmental Policy & Planning* **15**, 17–39 (2013).

14. Chen, H., Feng, L. & Sun, X. Beyond central-local relations: the introduction of a new perspective on China’s environmental governance model. *Humanit Soc Sci Commun* **11**, 1–12 (2024).

15. Wiedenbach, A. Divergent Central and Local Government Interests May Impede Implementation of China’s Climate Targets. *Climate Scorecard* https://www.climatescorecard.org/2021/08/divergent-central-and-local-government-interests-may-impede-implementation-of-chinas-climate-targets/ (2021).

16. Li, X., Pattberg, P. & Widerberg, O. China’s climate governance from 2009 to 2019: motivations, instruments, actors, and geopolitics. *Climate Policy* **24**, 378–395 (2024).

17. Dai, A., Gordon, J. & Zhu, Ri. Looking back and looking ahead: AN ANALYSIS OF PROVINCIAL TH FIVE-YEAR PLANS (2021-2025). (2024).

18. Carbon Brief. What does China’s 14th ‘five year plan’ mean for climate change? *Carbon Brief* https://www.carbonbrief.org/qa-what-does-chinas-14th-five-year-plan-mean-for-climate-change/ (2021).

19. NDRC. Mid-term evaluation report on the implementation of the Outline of the 14th Five-Year Plan for National Economic and Social Development of the People’s Republic of China and the Long-Term Objectives for 2035. https://www.ndrc.gov.cn/fzggw/wld/zsj/zyhd/202312/t20231227_1362958.html (2023).

20. State Council. China to take action for energy conservation, carbon reduction. https://english.www.gov.cn/policies/latestreleases/202405/29/content_WS66570ed0c6d0868f4e8e79d0.html (2024).

21. Ministry of Ecology and Environment. Progress on the Implementation of China’s Nationally Determined Contributions (2022). (2022).

22. McConaughey, M. *Green Lights*. (Crown, 2020).

23. The world bank. China Country Climate and Development Report. https://www.worldbank.org/en/country/china/publication/china-country-climate-and-development-report (2023).

24. State Council. China’s new ‘dual circulation’ development paradigm. https://english.www.gov.cn/news/topnews/202103/28/content_WS60604adbc6d0719374afba4a.html (2021).

25. State Council. Strides made in advancing Beautiful China Initiative: official. https://english.www.gov.cn/news/topnews/202210/21/content_WS63526392c6d0a757729e17e0.html.

26. State Council. China pushes ‘dual circulation’ to power growth in new development stage. https://english.www.gov.cn/news/topnews/202103/10/content_WS60486347c6d0719374afa854.html (2021).

27. Central Committee of the Communist Party & State Council. Opinions of the Central Committee of the Communist Party of China and the State Council on Comprehensively Promoting the Construction of a Beautiful China 中共中央 国务院关于全面推进美丽中国建设的意见_中央有关文件_中国政府网. https://www.gov.cn/zhengce/202401/content_6925405.htm (2024).

28. State Council. Implementation stressed for manufacturing vision. https://english.www.gov.cn/policies/latest_releases/2015/05/19/content_281475110703534.htm.

29. Conroy, G. How ‘Made in China 2025’ helped supercharge scientific development in China’s cities. *Nature* d41586-024-03522-y (2024) doi:10.1038/d41586-024-03522-y.

30. Arendse, H. China’s New Quality Productive Forces: An Explainer. *China Briefing News* https://www.china-briefing.com/news/chinas-new-quality-productive-forces-an-explainer/ (2024).

31. Wang, P. *et al.* CCUS development in China and forecast its contribution to emission reduction. *Sci Rep* **13**, 17811 (2023).

32. Ministry of Ecology and Environment. China Carbon Dioxide Capture, Utilization and Storage (CCUS) Annual Report (2021)-China CCUS Pathway Research (2021) 中国二氧化碳捕集利用与封 存 (CCUS) 年度报告. (2021).

33. State Council. China’s home appliance sales surge in 2024 under trade-in scheme. https://english.www.gov.cn/archive/statistics/202501/19/content_WS678c38fac6d0868f4e8eef62.html.

34. State Council. Consumption vouchers issued to boost spending in China. https://english.www.gov.cn/news/202409/26/content_WS66f51bc1c6d0868f4e8eb4af.html.

35. State Council. China’s property market shows stronger signs of recovery. https://english.www.gov.cn/archive/statistics/202412/16/content_WS6760192fc6d0868f4e8ee041.html (2024).

36. State Council. New urbanization implementation plan approved. https://english.www.gov.cn/policies/latestreleases/202206/07/content_WS629f170ac6d02e533532bcf7.html (2022).

37. State Council. China unveils new measures to stabilize housing market. https://english.www.gov.cn/news/202410/17/content_WS67111067c6d0868f4e8ebfd0.html (2024).

38. Gao, C., Chang, S. & Wang, Y. From global to national: The role of urban agglomerations in China’s new development paradigm. *PLoS ONE* **19**, e0305594 (2024).

39. Wang, S., Yang, C., Hou, D. & Dai, L. How do urban agglomerations drive economic development? A policy implementation and spatial effects perspective. *Economic Analysis and Policy* **80**, 1224–1238 (2023).

40. UN. World Population Prospects 2024 | Population Division. https://www.un.org/development/desa/pd/world-population-prospects-2024 (2024).

41. NDRC. Implementation Plan for New Urbanization in the 14th Five-Year Plan. (2022).

42. Central Committee of the Chinese Communist Party & State Council. Decision of the Central Committee of the Chinese Communist Party and of the State Council 中共中央 国务院关于优化生育政策促进人口长期均衡发展的决定_中央有关文件_中国政府网. https://www.gov.cn/zhengce/2021-07/20/content_5626190.htm.

43. Arendse, H. Urbanization in China - New Action Plan to Facilitate Urban Migration. https://www.china-briefing.com/news/urbanization-in-china-action-plan-migration/.

44. Interesse, G. China Tourism in 2023: Outlook, Trends and Opportunities. https://www.china-briefing.com/news/chinas-tourism-in-2023-outlook-trends-and-opportunities/.

45. You, X. The ‘new three’: How China came to lead solar, battery and EV manufacturing. https://dialogue.earth/en/business/new-three-china-solar-cell-lithium-battery-ev/ (2023).

46. Myllyvirta, L. Analysis: China’s emissions set to fall in 2024 after record growth in clean energy. *Carbon Brief* https://www.carbonbrief.org/analysis-chinas-emissions-set-to-fall-in-2024-after-record-growth-in-clean-energy/ (2023).

47. IEA. World Energy Outlook 2024 – Analysis. https://www.iea.org/reports/world-energy-outlook-2024 (2024).

48. IEA. World Energy Outlook 2023 – Analysis. *IEA* https://www.iea.org/reports/world-energy-outlook-2023 (2023).

49. The world bank. China Overview: Development news, research, data | World Bank. https://www.worldbank.org/en/country/china/overview (2024).

50. Rogoff, K. & Yang, Y. Rethinking China’s growth. *Economic Policy* **39**, 517–548 (2024).

51. IMF. China’s Real Estate Challenge. https://www.imf.org/en/Publications/fandd/issues/2024/12/chinas-real-estate-challenge-kenneth-rogoff (2024).

52. Wang, Y., Zhou, Y., Yu, X. & Liu, X. Is domestic consumption dragged down by real estate sector?—Evidence from Chinese household wealth. *International Review of Financial Analysis* **75**, 101749 (2021).

53. Ma, L. & Christensen, T. Government Trust, Social Trust, and Citizens’ Risk Concerns: Evidence from Crisis Management in China. *Public Performance & Management Review* **42**, 383–404 (2019).

54. China off track on emissions goals as energy demand offsets renewables push, researchers say. *Reuters* (2024).

55. The Straits Times. China at risk of missing 2025 climate targets, needs steep CO2 cuts: Study. *Carbon Brief* https://www.carbonbrief.org/daily-brief/china-at-risk-of-missing-2025-climate-targets-needs-steep-co2-cuts-study/ (2024).

56. Naughton, B. *The Chinese Economy: Transitions and Growth*. (MIT Press, Cambridge, Mass, 2007).

57. Naughton, B. J. The Chinese Economy: Adaptation and Growth, second edition. *MIT Press Books* **1**, (2018).

58. Knight, J. & Ding, S. *China’s Remarkable Economic Growth*. (Oxford University Press, 2012). doi:10.1093/acprof:oso/9780199698691.001.0001.

59. ICCSD. *China’s Long-Term Low-Carbon Development Strategies and Pathways: Comprehensive Report*. (Springer Singapore, Singapore, 2022). doi:10.1007/978-981-16-2524-4.

60. CNBC. China 2024 GDP forecasts by JPMorgan, Goldman, Citi, Morgan Stanley. https://www.cnbc.com/2024/01/17/china-2024-gdp-forecasts-by-jpmorgan-goldman-citi-morgan-stanley.html (2024).

61. IMF. *World Economic Outlook Update, January 2024: Moderating Inflation and Steady Growth Open Path to Soft Landing*. (2024).

62. JCER. China’s Growth Rate Below 3% after 2029 | Japan Center for Economic Research. https://www.jcer.or.jp/english/chinas-growth-rate-below-3-after-2029 (2023).

63. Carnegie. Can China’s Long-Term Growth Rate Exceed 2–3 Percent? - Carnegie Endowment for International Peace. https://carnegieendowment.org/chinafinancialmarkets/89466 (2023).

64. O’Neill, B. C. *et al.* The roads ahead: Narratives for shared socioeconomic pathways describing world futures in the 21st century. *Global Environmental Change* **42**, 169–180 (2017).

65. IIASA. Shared Socioeconomic Pathways Scenario Database (SSP) 3.0 realse. *IIASA - International Institute for Applied Systems Analysis* http://iiasa.ac.at/models-tools-data/ssp (2024).

66. National Bureau of Statistics of China. Main Data of the Seventh National Population Census. https://www.stats.gov.cn/english/PressRelease/202105/t20210510_1817185.html (2021).

67. Koch, J. & Leimbach, M. SSP economic growth projections: Major changes of key drivers in integrated assessment modelling. *Ecological Economics* **206**, 107751 (2023).

68. Chen, Y. *et al.* Provincial and gridded population projection for China under shared socioeconomic pathways from 2010 to 2100. *Sci Data* **7**, 83 (2020).

69. Dai, K., Shen, S. & Cheng, C. Evaluation and analysis of the projected population of China. *Sci Rep* **12**, 3644 (2022).

70. Gao, A. J. Downscaling Global Spatial Population Projections from 1/8-degree to 1-km Grid Cells. (2017).

71. Huang, J. *et al.* Effect of Fertility Policy Changes on the Population Structure and Economy of China: From the Perspective of the Shared Socioeconomic Pathways. *Earth’s Future* **7**, 250–265 (2019).

72. IHME. Homepage | Institute for Health Metrics and Evaluation. https://www.healthdata.org/ (2019).

73. WCDE. Wittgenstein Centre Human Capital Data Explorer. https://dataexplorer.wittgensteincentre.org/wcde-v2/ (2019).

74. Meng, M., Krey, V., Way, R., Kim, J. & Woo, J.-H. A generalized tool for projecting investment and fixed O&M costs across technologies, scenarios, and regions. in (2024).

75. Way, R., Ives, M. C., Mealy, P. & Farmer, J. D. Empirically grounded technology forecasts and the energy transition. *Joule* **6**, 2057–2082 (2022).

76. IEA. An energy sector roadmap to carbon neutrality in China. https://www.iea.org/reports/an-energy-sector-roadmap-to-carbon-neutrality-in-china (2021).

77. Chen, S., Liu, J., Zhang, Q., Teng, F. & McLellan, B. C. A critical review on deployment planning and risk analysis of carbon capture, utilization, and storage (CCUS) toward carbon neutrality. *Renewable and Sustainable Energy Reviews* **167**, 112537 (2022).
